# Supplementary material
Source: publisher figshare collection journal article supplement (https://gsapubs.figshare.com/articles/dataset/_/16847626)
Supplement: Supplementary file 1 [file 1]

## Sheet: Sheet1
Analysis	Th	U	Th/U	Isotope ratios						Ages
				Pb207/Pb206	1σ	Pb207/U235	1σ	Pb206/U238	1σ	Pb207/Pb206	1σ	Pb207/U235	1σ	Pb206/U238	1σ
LP-01
LP-01-01	105.43	85.91	1.22721	0.05801	0.01745	0.64481	0.19246	0.0807	0.00327	529.6	551.19	505.3	118.81	500.3	19.53
LP-01-02	178.53	220.42	0.809954	0.05646	0.00329	0.49889	0.0254	0.06415	0.00118	469.8	124.62	411	17.21	400.8	7.16
LP-01-03	67.88	54.8	1.23869	0.05498	0.01177	0.48812	0.10307	0.06445	0.00211	411.2	418.66	403.6	70.32	402.7	12.8
LP-01-04	142.21	174.27	0.816033	0.05408	0.00219	0.43496	0.01287	0.05838	0.00093	374.3	87.84	366.7	9.1	365.8	5.67
LP-01-05	126.43	110.69	1.1422	0.05424	0.00238	0.44857	0.01524	0.06003	0.00099	381.1	95.04	376.3	10.68	375.8	6
LP-01-06	66.64	60.55	1.10058	0.05422	0.00327	0.44141	0.02343	0.0591	0.00113	379.9	130.07	371.2	16.51	370.1	6.9
LP-01-07	348.8	706.38	0.493785	0.05537	0.00193	0.43712	0.00952	0.0573	0.00087	427	75.7	368.2	6.73	359.2	5.31
LP-01-08	109.56	84.49	1.29672	0.05613	0.00265	0.47311	0.01805	0.06118	0.00105	457.3	101.88	393.3	12.44	382.8	6.36
LP-01-09	301.04	180.19	1.67068	0.05908	0.00262	0.50916	0.01772	0.06256	0.00102	570	93.78	417.9	11.92	391.1	6.17
LP-01-10	478.62	486.99	0.982813	0.17988	0.00568	3.43472	0.05595	0.13859	0.00208	2651.8	51.43	1512.4	12.81	836.7	11.75
LP-01-11	65.97	81.33	0.81114	0.05574	0.01947	0.5176	0.17854	0.0674	0.00445	441.6	632.37	423.5	119.46	420.5	26.89
LP-01-12	328.55	357.12	0.919999	0.05472	0.00192	0.45638	0.01009	0.06053	0.00092	401	75.89	381.7	7.03	378.8	5.61
LP-01-13	51.86	202.88	0.255619	0.07295	0.0026	1.54912	0.03598	0.15411	0.00244	1012.5	70.68	950.1	14.33	924	13.61
LP-01-14	24.22	36.08	0.671286	0.15528	0.00512	9.9748	0.19405	0.46617	0.00761	2404.9	55	2432.5	17.95	2466.8	33.48
LP-01-15	139.63	132.08	1.05716	0.05682	0.00253	0.47888	0.01676	0.06116	0.00102	484	96.21	397.3	11.51	382.7	6.22
LP-01-16	89.85	82.17	1.09346	0.05742	0.00298	0.4947	0.02158	0.06252	0.00112	507.2	110.6	408.1	14.66	390.9	6.8
LP-01-17	116.67	117.71	0.991165	0.07866	0.00417	0.60691	0.02703	0.05598	0.00109	1163.7	101.57	481.6	17.08	351.2	6.64
LP-01-18	245.41	208.44	1.17737	0.05569	0.00213	0.48513	0.01304	0.06321	0.001	439.7	83.07	401.6	8.92	395.1	6.05
LP-01-19	16.7	24.52	0.681077	0.15303	0.0052	9.54531	0.20384	0.45259	0.00773	2380.1	56.81	2391.9	19.63	2406.7	34.29
LP-01-20	287.47	217.83	1.3197	0.06163	0.00347	0.65639	0.03195	0.07727	0.00148	661.4	116.23	512.4	19.59	479.8	8.85
LP-01-21	125.48	214.93	0.583818	0.05862	0.00222	0.51357	0.01353	0.06357	0.001	553.1	80.57	420.8	9.08	397.3	6.09
LP-01-22	185.11	192.36	0.96231	0.05791	0.00377	0.48912	0.02859	0.06128	0.0012	526	136.98	404.3	19.5	383.4	7.31
LP-01-23	21.49	35.65	0.602805	0.15097	0.00499	9.11409	0.17975	0.43801	0.00718	2356.9	55.44	2349.5	18.05	2341.7	32.21
LP-01-24	47.73	71.2	0.670365	0.06076	0.00467	0.5392	0.0381	0.06439	0.00149	630.6	157.33	437.9	25.13	402.3	9.01
LP-01-25	138.96	163.97	0.847472	0.11937	0.00454	1.01858	0.02678	0.0619	0.00104	1946.8	66.46	713.2	13.47	387.2	6.32
LP-01-26	99.5	110.33	0.90184	0.05404	0.00234	0.44604	0.01501	0.05988	0.00099	372.5	94.22	374.5	10.54	374.9	6.03
LP-01-27	2731.24	166.05	16.4483	0.06239	0.00553	0.6047	0.05048	0.07031	0.00166	687.5	178.62	480.2	31.94	438	9.99
LP-01-28	780.59	566.92	1.3769	0.08587	0.00715	0.789	0.06083	0.06665	0.00187	1335.2	153.18	590.6	34.53	416	11.32
LP-01-29	121.74	393.22	0.309598	0.0774	0.00259	1.60504	0.03208	0.15043	0.00233	1131.4	65.22	972.2	12.5	903.4	13.03
LP-01-30	445.74	1264.79	0.352422	0.07572	0.00255	1.42986	0.02922	0.13697	0.0021	1087.8	66.11	901.5	12.21	827.5	11.92
LP-01-31	105.89	125.89	0.841131	0.18945	0.00708	1.75281	0.04409	0.06711	0.00118	2737.4	60.22	1028.2	16.26	418.7	7.12
LP-01-32	102.59	65.31	1.57082	0.15159	0.00486	8.67776	0.156	0.41522	0.00655	2363.9	53.74	2304.7	16.37	2238.7	29.86
LP-01-33	81.67	61.62	1.32538	0.05688	0.00309	0.47507	0.02214	0.06058	0.00112	486.1	116.44	394.7	15.24	379.2	6.83
LP-01-34	65.07	80.78	0.805521	0.05664	0.00272	0.51192	0.02017	0.06555	0.00114	477	103.65	419.7	13.55	409.3	6.9
LP-01-35	95.55	127.56	0.749059	0.05785	0.00248	0.495	0.01632	0.06207	0.00103	523.7	91.44	408.3	11.09	388.2	6.25
LP-01-36	16.27	38.5	0.422597	0.14309	0.00498	8.4832	0.19405	0.43001	0.00757	2264.9	58.79	2284.1	20.78	2305.7	34.13
LP-01-37	194.1	114.3	1.69816	0.05407	0.00235	0.46136	0.01565	0.06188	0.00103	374	94.44	385.2	10.87	387	6.24
LP-01-38	115.52	168.03	0.687496	0.05498	0.00218	0.44398	0.01286	0.05857	0.00094	411.3	85.76	373.1	9.04	366.9	5.74
LP-01-39	92.99	98.63	0.942817	0.05782	0.00271	0.49751	0.01892	0.0624	0.00109	522.8	99.98	410	12.83	390.2	6.59
LP-01-40	220.37	165.91	1.32825	0.05524	0.00217	0.47945	0.01365	0.06294	0.00101	421.9	85.02	397.7	9.37	393.5	6.13
LP-01-41	265.13	380.89	0.69608	0.07925	0.00281	1.81867	0.04239	0.16642	0.00267	1178.4	68.54	1052.2	15.27	992.4	14.73
LP-01-42	98.97	150.98	0.655517	0.07645	0.00255	2.02984	0.04095	0.19255	0.00301	1106.8	65.36	1125.6	13.72	1135.2	16.25
LP-01-43	367.32	528.15	0.695484	0.06034	0.00222	0.62021	0.01554	0.07454	0.00118	615.8	77.39	490	9.74	463.4	7.1
LP-01-44	131.8	88.08	1.49637	0.05646	0.00348	0.4486	0.02447	0.05761	0.00115	469.8	131.52	376.3	17.15	361.1	7.02
LP-01-45	121.71	101.68	1.19699	0.05307	0.00251	0.46197	0.0178	0.06312	0.00109	331.8	103.55	385.6	12.36	394.6	6.63
LP-01-46	127.92	252.26	0.507096	0.15482	0.0048	8.52407	0.13743	0.39922	0.00608	2399.9	51.79	2288.5	14.65	2165.5	28
LP-01-47	141.2	205.51	0.687071	0.0695	0.00229	1.50365	0.0292	0.15688	0.00242	913.6	66.31	931.9	11.84	939.4	13.49
LP-01-48	131.13	177.45	0.738969	0.05336	0.00208	0.44979	0.0127	0.06112	0.00098	344.2	85.7	377.1	8.9	382.4	5.96
LP-01-49	85.16	150.62	0.565396	0.05716	0.00247	0.45993	0.01542	0.05834	0.00098	497.1	92.88	384.2	10.73	365.5	5.98
LP-01-50	390.06	244.72	1.5939	0.17376	0.00538	7.89499	0.1272	0.32944	0.00503	2594.2	50.72	2219.1	14.52	1835.7	24.37
LP-01-51	60.27	169.45	0.35568	0.16087	0.00513	10.4773	0.18972	0.4722	0.00758	2464.8	52.89	2477.9	16.78	2493.2	33.19
LP-01-52	176.43	115.86	1.52279	0.05867	0.00253	0.46683	0.01562	0.05769	0.00097	554.8	91.26	389	10.81	361.6	5.9
LP-01-53	92.93	138.8	0.669524	0.05961	0.00299	0.51279	0.02149	0.06237	0.00113	589.4	105.29	420.3	14.43	390	6.88
LP-01-54	25.42	64.78	0.392405	0.23476	0.00736	21.6262	0.37636	0.66788	0.0108	3084.8	49.2	3167.1	16.89	3297.7	41.73
LP-01-55	67.31	54.43	1.23663	0.06401	0.00329	0.56409	0.02444	0.06389	0.00117	741.9	105.11	454.2	15.87	399.3	7.12
LP-01-56	59.53	71.4	0.833754	0.05466	0.00309	0.44907	0.02211	0.05956	0.00113	398.4	121.9	376.6	15.5	372.9	6.89
LP-01-57	111.94	78.8	1.42056	0.05393	0.00413	0.4572	0.03253	0.06146	0.00124	368.2	163.6	382.3	22.66	384.5	7.54
LP-01-58	106.79	687.38	0.155358	0.0735	0.0023	1.74951	0.02927	0.17255	0.00262	1027.9	61.93	1027	10.81	1026.1	14.42
LP-01-59	506.51	436.61	1.1601	0.19301	0.00593	7.17364	0.11361	0.26944	0.0041	2768	49.57	2133.2	14.11	1537.9	20.81
LP-01-60	198.05	314.43	0.62987	0.16074	0.01204	9.52992	0.69854	0.42979	0.01899	2463.5	121.32	2390.4	67.36	2304.8	85.62
LP-01-61	150.49	118.85	1.26622	0.09599	0.00308	3.68734	0.06813	0.27846	0.00437	1547.6	59.19	1568.6	14.76	1583.6	22.01
LP-01-62	195.79	168.19	1.1641	0.0548	0.00236	0.47866	0.01607	0.06331	0.00107	404.2	93.07	397.2	11.04	395.7	6.47
LP-01-63	171.31	139.14	1.23121	0.05251	0.00221	0.45431	0.01473	0.06271	0.00104	307.8	93.15	380.3	10.29	392.1	6.31
LP-01-64	279.93	254.27	1.10092	0.05618	0.00213	0.48383	0.01303	0.06242	0.00101	458.8	81.98	400.7	8.92	390.4	6.1
LP-01-65	183.89	423.14	0.434584	0.0769	0.0024	2.03885	0.0344	0.19217	0.00294	1118.7	61.08	1128.6	11.49	1133.1	15.88
LP-01-66	70.11	116.02	0.604292	0.06446	0.00232	1.05794	0.02577	0.11896	0.00191	756.9	74.13	732.8	12.72	724.6	11.03
LP-01-67	64.71	68.26	0.947993	0.05576	0.00327	0.48251	0.02492	0.06273	0.00121	442.3	125.78	399.8	17.07	392.2	7.36
LP-01-68	104.88	141.52	0.741097	0.07139	0.00239	1.63345	0.03377	0.16584	0.00262	968.7	66.82	983.2	13.02	989.1	14.48
LP-01-69	92.72	1295.67	0.0715614	0.10648	0.00325	3.25563	0.05114	0.22163	0.00336	1739.9	55.05	1470.5	12.2	1290.5	17.75
LP-01-70	170.9	337.17	0.506866	0.1041	0.00324	4.37485	0.07316	0.3046	0.00469	1698.5	56.19	1707.6	13.82	1714.1	23.19
LP-01-71	81.85	102.61	0.797681	0.05831	0.0036	0.47529	0.02611	0.05908	0.0012	540.7	130.35	394.8	17.97	370	7.31
LP-01-72	100.21	143.09	0.700328	0.05637	0.00243	0.46846	0.01584	0.06023	0.00102	466.4	93.66	390.1	10.95	377	6.22
LP-02
LP-02-01	60.59	156.39	0.387429	0.14416	0.00429	8.52783	0.19612	0.42913	0.00993	2277.8	50.31	2288.9	20.9	2301.8	44.79
LP-02-02	305.71	350.78	0.871515	0.13934	0.00463	7.49504	0.20521	0.39021	0.00948	2219	56.49	2172.4	24.53	2123.8	43.96
LP-02-03	57.48	213.6	0.269101	0.05439	0.00177	0.56378	0.01484	0.0752	0.00175	387	71.1	454	9.63	467.4	10.49
LP-02-04	190.22	89.81	2.11803	0.11594	0.00348	5.41392	0.12616	0.33874	0.00784	1894.5	53	1887.1	19.97	1880.6	37.77
LP-02-05	94.98	81.16	1.17028	0.08176	0.00266	2.33873	0.06176	0.20751	0.00488	1239.7	62.46	1224.1	18.78	1215.6	26.03
LP-02-06	244.19	456.43	0.535	0.05363	0.00166	0.5329	0.01305	0.07209	0.00167	355.2	68.46	433.7	8.65	448.7	10.02
LP-02-07	227.07	76.56	2.96591	0.11057	0.00339	5.02491	0.1209	0.32965	0.00767	1808.8	54.65	1823.5	20.38	1836.7	37.2
LP-02-08	81.14	176	0.461023	0.11561	0.00347	5.41547	0.12589	0.3398	0.00786	1889.3	53.03	1887.3	19.92	1885.7	37.8
LP-02-09	44.85	855.15	0.0524469	0.0711	0.00212	1.54002	0.03534	0.15713	0.00362	960.2	59.68	946.5	14.13	940.8	20.15
LP-02-10	214.56	177.32	1.21002	0.12156	0.00389	6.22225	0.10987	0.37118	0.00575	1979.1	55.91	2007.6	15.45	2034.9	27.03
LP-02-11	47.36	219.83	0.215439	0.06997	0.00215	1.48352	0.03578	0.1538	0.00356	927.4	61.89	923.7	14.63	922.2	19.87
LP-02-12	110.89	248.15	0.446867	0.1196	0.00356	5.5116	0.1265	0.33428	0.0077	1950.3	52.3	1902.4	19.73	1859.1	37.22
LP-02-13	148.94	62.69	2.37582	0.058	0.00237	0.50942	0.01814	0.06371	0.00153	529.5	87.41	418.1	12.2	398.1	9.28
LP-02-14	256.1	393.7	0.650495	0.0533	0.00168	0.50556	0.01262	0.0688	0.00159	341.6	69.76	415.5	8.51	428.9	9.59
LP-02-15	212.49	110.62	1.9209	0.05433	0.00205	0.45197	0.01457	0.06034	0.00143	384.6	82.03	378.7	10.19	377.7	8.68
LP-02-16	56.24	168.07	0.334622	0.05668	0.00196	0.55455	0.01588	0.07096	0.00166	478.5	75.44	448	10.37	442	10
LP-02-17	114.12	105	1.08686	0.14277	0.00433	8.29575	0.19553	0.42145	0.00977	2261.1	51.41	2263.9	21.36	2267	44.31
LP-02-18	126.44	318.82	0.396587	0.0687	0.00211	1.4277	0.03434	0.15073	0.00348	889.8	62.28	900.6	14.36	905.1	19.49
LP-02-19	66.26	214.18	0.309366	0.06964	0.00216	1.4224	0.03455	0.14815	0.00342	917.6	62.44	898.4	14.48	890.6	19.21
LP-02-20	44.05	85.92	0.512686	0.14722	0.00447	8.34219	0.19685	0.411	0.00952	2313.9	51.24	2268.9	21.4	2219.5	43.52
LP-02-21	91.7	131.85	0.695487	0.12509	0.00411	6.05574	0.11469	0.35101	0.00555	2030.1	57.03	1983.9	16.51	1939.4	26.48
LP-02-22	37.57	52.66	0.713445	0.12945	0.00407	6.41882	0.15974	0.35965	0.00843	2090.5	54.24	2034.8	21.86	1980.5	39.96
LP-02-23	32.26	49.08	0.657294	0.10629	0.00339	4.72848	0.12033	0.32266	0.00756	1736.7	57.35	1772.3	21.33	1802.7	36.86
LP-02-24	120.12	175.59	0.684094	0.14689	0.00442	8.51639	0.19747	0.4205	0.00969	2310.1	50.79	2287.7	21.07	2262.7	43.97
LP-02-25	259.49	341.53	0.759787	0.16042	0.0049	9.30744	0.22108	0.42081	0.00976	2460	50.76	2368.8	21.78	2264.2	44.29
LP-02-26	106.38	574.1	0.185299	0.07191	0.0022	1.48234	0.03507	0.14951	0.00344	983.3	60.97	923.2	14.35	898.2	19.29
LP-02-27	149.67	156.15	0.958501	0.11639	0.00355	5.43364	0.12819	0.3386	0.00781	1901.4	53.79	1890.2	20.23	1879.9	37.62
LP-02-28	241.07	317.3	0.759754	0.0532	0.00181	0.43098	0.01197	0.05876	0.00136	337.2	75.2	363.9	8.49	368.1	8.31
LP-02-29	191.42	352.34	0.543282	0.05545	0.00178	0.50223	0.01278	0.06569	0.00152	430	69.6	413.2	8.64	410.2	9.17
LP-02-30	18.84	56.07	0.336009	0.12664	0.00395	5.99933	0.14692	0.34359	0.008	2051.8	54.1	1975.7	21.31	1903.9	38.36
LP-02-31	547.41	434.4	1.26015	0.05329	0.0017	0.42724	0.01081	0.05814	0.00134	341.2	70.73	361.2	7.69	364.3	8.17
LP-02-32	60.64	103.97	0.583245	0.16192	0.00493	9.958	0.23381	0.44604	0.01029	2475.8	50.44	2430.9	21.66	2377.6	45.89
LP-02-33	215.81	205.99	1.04767	0.05604	0.00189	0.53252	0.01457	0.06892	0.0016	453.4	73.12	433.5	9.66	429.7	9.65
LP-02-34	49.43	127.31	0.388265	0.068	0.0022	1.41527	0.03659	0.15094	0.0035	868.6	65.76	895.4	15.38	906.2	19.6
LP-02-35	12.91	24.96	0.517228	0.12735	0.00409	6.77899	0.17378	0.38607	0.00909	2061.7	55.64	2083	22.68	2104.6	42.25
LP-02-36	11.47	68.86	0.16657	0.12549	0.0039	6.09929	0.14765	0.35249	0.00817	2035.8	53.91	1990.1	21.12	1946.5	38.93
LP-02-37	126.7	227.36	0.557266	0.06935	0.00217	1.34436	0.03286	0.14059	0.00324	909.2	63.16	865.1	14.23	848	18.29
LP-02-38	111.61	161.2	0.69237	0.11835	0.00363	5.72947	0.13545	0.35109	0.00808	1931.5	53.85	1935.8	20.44	1939.8	38.55
LP-02-39	228.03	455.97	0.500099	0.05449	0.00173	0.56133	0.01403	0.07471	0.00172	391.3	69.02	452.4	9.12	464.5	10.31
LP-02-40	75.83	562.13	0.134898	0.06955	0.00213	1.59665	0.03758	0.16648	0.00382	915.2	61.7	968.9	14.69	992.7	21.09
LP-02-41	34.26	38.12	0.898741	0.12679	0.00404	6.32365	0.15917	0.3617	0.00845	2054	55.2	2021.7	22.07	1990.2	40
LP-02-42	56.51	123.62	0.457127	0.16002	0.0049	9.98595	0.23525	0.45259	0.01042	2455.8	50.83	2433.5	21.74	2406.7	46.25
LP-02-43	25.68	42.67	0.601828	0.11586	0.00373	5.20937	0.13305	0.32608	0.00762	1893.3	56.83	1854.1	21.76	1819.4	37.04
LP-02-44	728.43	293.63	2.48078	0.14841	0.00471	8.05892	0.20105	0.39382	0.0092	2327.6	53.35	2237.7	22.53	2140.5	42.57
LP-02-45	78.17	227.49	0.343619	0.05585	0.00188	0.51726	0.01408	0.06717	0.00155	445.9	73.25	423.3	9.42	419.1	9.39
LP-02-46	54.77	135.68	0.40367	0.05887	0.00231	0.59686	0.01999	0.07352	0.00174	562.4	83.09	475.2	12.71	457.3	10.46
LP-02-47	266.58	206.34	1.29195	0.05369	0.00216	0.51718	0.01791	0.06985	0.00166	358.1	87.97	423.3	11.99	435.3	9.99
LP-02-48	157.59	341.96	0.460843	0.11222	0.00355	4.82233	0.11936	0.31164	0.00723	1835.7	56.15	1788.8	20.82	1748.8	35.55
LP-02-49	81.12	75.03	1.08117	0.07064	0.00238	1.5417	0.04206	0.15829	0.00368	946.9	67.64	947.2	16.8	947.2	20.49
LP-02-50	152.38	361.98	0.420962	0.05413	0.00175	0.51166	0.01311	0.06855	0.00158	376.3	71.12	419.6	8.8	427.4	9.51
LP-02-51	84.91	356.94	0.237883	0.07044	0.00218	1.54274	0.03687	0.15884	0.00364	941.1	62.28	947.6	14.73	950.3	20.24
LP-02-52	262.62	298.09	0.881009	0.05701	0.00185	0.54795	0.01408	0.0697	0.0016	491.4	70.68	443.7	9.24	434.4	9.66
LP-02-53	218.93	104.29	2.09924	0.05562	0.00449	0.43754	0.03353	0.05705	0.00167	437.1	170.53	368.5	23.69	357.6	10.17
LP-02-54	90.43	453.82	0.199264	0.07425	0.0023	1.66552	0.03977	0.16268	0.00372	1048.2	61.3	995.5	15.15	971.6	20.65
LP-02-55	92.28	242.42	0.380662	0.05799	0.00191	0.5698	0.01491	0.07126	0.00164	529	70.9	457.9	9.64	443.7	9.87
LP-02-56	175.48	841.45	0.208545	0.06616	0.00206	0.96802	0.02315	0.10611	0.00243	811.4	63.68	687.4	11.95	650.1	14.14
LP-02-57	297.02	1088.45	0.272883	0.11679	0.00357	5.44982	0.12701	0.33842	0.00773	1907.6	53.94	1892.7	20	1879.1	37.21
LP-02-58	393.68	1158.48	0.339825	0.05731	0.00179	0.54235	0.01302	0.06863	0.00157	502.9	67.63	440	8.57	427.9	9.46
LP-02-59	758.51	616.53	1.23029	0.05719	0.00183	0.5578	0.01392	0.07073	0.00162	498.5	69.37	450.1	9.07	440.5	9.76
LP-02-60	276.53	390.34	0.708434	0.09314	0.00292	2.92932	0.04781	0.22806	0.00342	1490.6	58.29	1389.5	12.36	1324.3	17.95
LP-02-61	87.15	268.79	0.324231	0.13409	0.00433	7.17847	0.18328	0.38824	0.00909	2152.2	55.38	2133.8	22.76	2114.6	42.22
LP-02-62	236.81	192.1	1.23274	0.15131	0.00472	8.98865	0.21578	0.43083	0.0099	2360.7	52.29	2336.9	21.94	2309.4	44.62
LP-02-63	65.59	99.18	0.661323	0.15133	0.00472	8.66917	0.20769	0.41546	0.00954	2361	52.25	2303.8	21.81	2239.8	43.46
LP-02-64	127.72	121.68	1.04964	0.16175	0.00503	9.71719	0.23169	0.43568	0.01	2474	51.53	2408.3	21.95	2331.3	44.88
LP-02-65	40.85	213.13	0.191667	0.07142	0.00228	1.53775	0.0383	0.15615	0.00358	969.4	63.9	945.6	15.33	935.4	19.97
LP-02-66	154.67	124.19	1.24543	0.0704	0.0023	1.58454	0.0409	0.16323	0.00376	940	65.65	964.2	16.07	974.7	20.83
LP-02-67	122.31	279.72	0.437259	0.12551	0.0039	6.14976	0.14611	0.35533	0.00812	2036.1	53.95	1997.3	20.75	1960	38.64
LP-02-68	218.19	400.89	0.544264	0.05661	0.00185	0.55827	0.01437	0.07152	0.00164	475.7	71.42	450.4	9.36	445.3	9.87
LP-02-69	68.24	98.66	0.691668	0.09151	0.00295	3.03494	0.07634	0.24052	0.00554	1457.1	60.14	1416.5	19.21	1389.4	28.78
LP-02-70	302.74	442.35	0.68439	0.06201	0.00221	0.58817	0.01717	0.06878	0.0016	674.6	74.39	469.7	10.98	428.8	9.64
LP-02-71	131.28	192.01	0.683714	0.05986	0.00207	0.58432	0.01639	0.07079	0.00164	598.5	73.31	467.2	10.5	440.9	9.85
LP-02-72	432.92	1017.8	0.425349	0.12613	0.00396	6.33356	0.1534	0.36417	0.00837	2044.7	54.51	2023.1	21.24	2001.9	39.56
LP-03
LP-03-01	45.61	68.98	0.661206	0.15308	0.00481	9.37052	0.14894	0.44398	0.00663	2380.6	52.53	2374.9	14.58	2368.4	29.62
LP-03-02	434.79	969.71	0.448371	0.05666	0.00213	0.54138	0.01398	0.06928	0.00109	477.7	81.87	439.3	9.21	431.8	6.55
LP-03-03	103.66	136.59	0.758914	0.14358	0.0045	8.14787	0.12819	0.41159	0.00612	2270.8	53	2247.6	14.23	2222.2	27.97
LP-03-04	327.46	296.56	1.10419	0.13126	0.00415	7.00776	0.11469	0.38721	0.00584	2114.9	54.38	2112.4	14.54	2109.9	27.13
LP-03-05	1085.03	1111.66	0.976045	0.05396	0.00217	0.40176	0.01174	0.05398	0.00086	369.4	87.82	342.9	8.51	338.9	5.28
LP-03-06	171.96	103.81	1.65649	0.14652	0.00492	7.86452	0.15937	0.38929	0.00648	2305.6	56.52	2215.6	18.26	2119.6	30.05
LP-03-07	5573.32	798.24	6.98201	0.19927	0.00625	3.6218	0.05737	0.13182	0.00197	2820.2	50.35	1554.3	12.6	798.2	11.19
LP-03-08	261.15	223.09	1.1706	0.11472	0.00358	5.40024	0.08441	0.34141	0.00507	1875.4	55.29	1884.9	13.39	1893.4	24.35
LP-03-09	36.51	49.33	0.740118	0.15304	0.00483	8.90465	0.14572	0.42199	0.00638	2380.2	52.83	2328.3	14.94	2269.5	28.93
LP-03-10	385.2	284.09	1.35591	0.16313	0.00508	9.58891	0.1483	0.42631	0.00632	2488.3	51.57	2396.1	14.22	2289.1	28.57
LP-03-11	72.11	107.75	0.669234	0.14787	0.00463	8.03781	0.12717	0.39423	0.00588	2321.4	52.74	2235.3	14.29	2142.4	27.2
LP-03-12	171.16	301.69	0.567337	0.05557	0.00186	0.5105	0.00989	0.06661	0.001	435.1	72.55	418.8	6.65	415.7	6.07
LP-03-13	98.05	180.88	0.542072	0.11391	0.00356	5.47285	0.08655	0.34844	0.00519	1862.7	55.46	1896.3	13.58	1927.1	24.83
LP-03-14	44.75	95.22	0.469964	0.12243	0.00383	5.92514	0.09363	0.35098	0.00524	1991.9	54.61	1964.9	13.73	1939.3	24.98
LP-03-15	376.18	267.9	1.40418	0.13111	0.0041	3.796	0.05957	0.20997	0.00312	2112.9	53.78	1591.9	12.61	1228.7	16.64
LP-03-16	151.2	287.67	0.525602	0.14831	0.00461	9.1426	0.14144	0.44706	0.00664	2326.5	52.37	2352.4	14.16	2382.2	29.57
LP-03-17	72.35	149.38	0.484335	0.11622	0.00363	5.25384	0.08224	0.32784	0.00488	1898.9	55.05	1861.4	13.35	1827.9	23.68
LP-03-18	194.37	504.12	0.385563	0.14176	0.00447	7.41288	0.12158	0.37922	0.00574	2248.8	53.5	2162.5	14.67	2072.7	26.83
LP-03-19	99.03	840.43	0.117833	0.12375	0.00499	5.67186	0.17254	0.3324	0.00653	2010.9	69.92	1927.1	26.26	1850	31.58
LP-03-20	141.53	192.67	0.734572	0.11823	0.00368	5.64195	0.08785	0.34606	0.00515	1929.7	54.72	1922.5	13.43	1915.7	24.65
LP-03-21	88.53	157.19	0.563204	0.12062	0.00379	5.39076	0.08741	0.32412	0.00487	1965.3	55.01	1883.4	13.89	1809.8	23.73
LP-03-22	1231.29	871.48	1.41287	0.05641	0.00249	0.41566	0.01424	0.05343	0.00089	467.6	95.48	352.9	10.21	335.6	5.46
LP-03-23	141.12	99.71	1.4153	0.14742	0.0046	8.5588	0.13437	0.42104	0.00629	2316.1	52.54	2292.2	14.27	2265.2	28.54
LP-03-24	413.84	494.89	0.836226	0.12264	0.00382	3.27032	0.05115	0.19338	0.00288	1995	54.38	1474	12.16	1139.6	15.55
LP-03-25	71.34	217.74	0.327638	0.1512	0.0047	8.37285	0.12982	0.40159	0.00598	2359.5	52.1	2272.2	14.06	2176.3	27.51
LP-03-26	83.62	110.46	0.757016	0.12419	0.00388	6.09461	0.0964	0.35589	0.00533	2017.2	54.35	1989.5	13.8	1962.7	25.33
LP-03-27	24.99	82.91	0.301411	0.11997	0.00377	6.14325	0.09957	0.37133	0.0056	1955.8	55.01	1996.4	14.15	2035.6	26.31
LP-03-28	2563.71	2270.39	1.12919	0.0578	0.00189	0.45025	0.00821	0.05648	0.00085	521.9	70.83	377.5	5.75	354.2	5.17
LP-03-29	107.08	221.61	0.483191	0.11738	0.00367	5.76302	0.09191	0.35604	0.00534	1916.7	55.04	1940.9	13.8	1963.4	25.4
LP-03-30	103.35	165.05	0.626174	0.11792	0.00374	5.91169	0.09974	0.36356	0.00556	1924.9	55.69	1963	14.65	1999	26.28
LP-03-31	40.84	10.92	3.73993	0.1235	0.00427	5.97557	0.13116	0.35086	0.00587	2007.5	60.11	1972.3	19.09	1938.7	28.01
LP-03-32	10.04	325.71	0.030825	0.11942	0.0037	5.78142	0.08954	0.35106	0.00523	1947.6	54.43	1943.6	13.41	1939.7	24.96
LP-03-33	61.96	95.99	0.645484	0.13756	0.00429	7.97361	0.12675	0.42032	0.00632	2196.8	53.22	2228	14.34	2261.9	28.69
LP-03-34	265.22	1137.52	0.233156	0.10839	0.00336	2.06502	0.032	0.13815	0.00206	1772.5	55.63	1137.3	10.6	834.2	11.66
LP-03-35	240.42	538.46	0.446496	0.14578	0.00453	7.75935	0.12156	0.38599	0.00578	2296.9	52.49	2203.5	14.09	2104.2	26.88
LP-03-36	36.7	107.23	0.342255	0.13986	0.00449	7.14237	0.12614	0.37032	0.00577	2225.5	54.52	2129.3	15.73	2030.9	27.14
LP-03-37	69.6	138.76	0.501585	0.15584	0.00484	9.64187	0.15081	0.44865	0.00673	2411	51.79	2401.2	14.39	2389.2	29.93
LP-03-38	25.93	44.18	0.586917	0.14957	0.00468	8.85326	0.14314	0.42921	0.00651	2341	52.59	2323	14.75	2302.2	29.36
LP-03-39	21.72	70.3	0.308962	0.1171	0.00367	5.72701	0.09346	0.35465	0.00537	1912.4	55.27	1935.5	14.11	1956.8	25.55
LP-03-40	268.56	1087.18	0.247024	0.13325	0.00417	7.06012	0.11542	0.38421	0.00587	2141.2	53.77	2119	14.54	2095.9	27.32
LP-03-41	16.89	6.57	2.57078	0.11808	0.00489	5.86052	0.18825	0.3599	0.00723	1927.4	72.46	1955.4	27.86	1981.7	34.27
LP-03-42	43.39	128.54	0.33756	0.15906	0.00497	9.46894	0.15324	0.43167	0.00656	2445.7	51.99	2384.5	14.86	2313.3	29.54
LP-03-43	192.73	113.19	1.70271	0.1851	0.00579	8.707	0.14124	0.34111	0.00519	2699.1	50.77	2307.8	14.77	1892	24.96
LP-03-44	24.25	42.83	0.566192	0.15023	0.00555	8.96455	0.23963	0.4327	0.00854	2348.6	61.82	2334.4	24.42	2317.9	38.41
LP-03-45	58.33	1044.8	0.0558289	0.11516	0.00357	1.82189	0.02849	0.11472	0.00172	1882.4	54.86	1053.4	10.25	700.1	9.93
LP-03-46	47.29	74.43	0.635362	0.14738	0.00459	8.49714	0.13535	0.41807	0.00632	2315.7	52.47	2285.6	14.47	2251.7	28.71
LP-03-47	99.01	143.59	0.689533	0.11136	0.00346	5.24883	0.08274	0.34179	0.00513	1821.7	55.32	1860.6	13.44	1895.3	24.66
LP-03-48	13.87	37.05	0.374359	0.11361	0.0036	5.47413	0.09364	0.3494	0.00536	1857.9	56.25	1896.5	14.69	1931.7	25.63
LP-03-49	35.65	624.45	0.0570902	0.11637	0.00362	5.29453	0.0839	0.3299	0.00497	1901.2	54.82	1868	13.53	1837.9	24.1
LP-03-50	38.98	89.95	0.433352	0.13904	0.00435	7.79186	0.12683	0.40636	0.00619	2215.3	53.23	2207.3	14.65	2198.3	28.36
LP-03-51	30.79	44.56	0.690978	0.14959	0.00467	9.37997	0.15227	0.45469	0.00693	2341.2	52.5	2375.9	14.9	2416.1	30.71
LP-03-52	88.92	156.29	0.568942	0.15131	0.00468	9.53077	0.1489	0.45674	0.00687	2360.8	51.89	2390.5	14.36	2425.1	30.39
LP-03-53	190.73	205.39	0.928624	0.10848	0.00344	4.29377	0.07349	0.28701	0.0044	1774	56.83	1692.2	14.1	1626.6	22.02
LP-03-54	115.83	183.64	0.630745	0.12589	0.00392	5.99703	0.0963	0.34542	0.00523	2041.4	54.07	1975.4	13.98	1912.7	25.05
LP-03-55	293.23	442.41	0.662801	0.14593	0.00452	7.91527	0.12442	0.39331	0.00593	2298.7	52.3	2221.4	14.17	2138.2	27.43
LP-03-56	2069.45	994.66	2.08056	0.05546	0.00196	0.55709	0.01263	0.07283	0.00112	430.7	76.82	449.6	8.24	453.2	6.74
LP-03-57	236.29	1838.45	0.128527	0.13265	0.0041	6.81496	0.10614	0.37254	0.0056	2133.3	53.07	2087.7	13.79	2041.3	26.32
LP-03-58	97.16	128.15	0.758174	0.14146	0.00439	8.07135	0.12779	0.41372	0.00625	2245.2	52.63	2239	14.3	2231.9	28.52
LP-03-59	267.77	297	0.901582	0.13834	0.00429	7.34747	0.1167	0.38513	0.00583	2206.5	52.89	2154.6	14.2	2100.2	27.11
LP-03-60	5.29	14.6	0.362329	0.11262	0.00377	5.43428	0.11096	0.34991	0.00568	1842	59.43	1890.3	17.51	1934.2	27.14
LP-03-61	17.35	61.3	0.283034	0.12117	0.00378	5.91333	0.09588	0.35387	0.00538	1973.5	54.54	1963.2	14.08	1953.1	25.62
LP-03-62	70.7	116.92	0.604687	0.13172	0.00409	7.07211	0.11348	0.3893	0.00591	2121.1	53.47	2120.5	14.27	2119.6	27.43
LP-03-63	126.39	122.92	1.02823	0.06028	0.00219	0.49537	0.01194	0.05958	0.00093	613.7	76.66	408.6	8.11	373.1	5.65
LP-03-64	17.19	18.67	0.920728	0.13739	0.0044	7.64882	0.13756	0.40368	0.00638	2194.6	54.66	2190.6	16.15	2186	29.3
LP-03-65	63.62	79.29	0.802371	0.15105	0.00468	9.3776	0.14856	0.45018	0.00682	2357.8	51.94	2375.6	14.54	2396.1	30.34
LP-03-66	207.67	165.03	1.25838	0.16108	0.00497	10.7459	0.16818	0.48373	0.00731	2467	51.21	2501.4	14.54	2543.5	31.75
LP-03-67	323.02	880.35	0.366922	0.13748	0.00433	7.94134	0.13547	0.41884	0.00657	2195.7	53.66	2224.4	15.38	2255.2	29.83
LP-03-68	300.2	262.86	1.14205	0.13075	0.00412	6.60312	0.11181	0.36621	0.00567	2108	54.21	2059.8	14.93	2011.5	26.74
LP-03-69	35.63	59.64	0.597418	0.13293	0.00414	6.85824	0.11153	0.3741	0.00571	2137	53.5	2093.3	14.41	2048.7	26.8
LP-03-70	31.21	91.64	0.340572	0.14813	0.00459	8.95299	0.14264	0.43827	0.00666	2324.4	52.17	2333.2	14.55	2342.9	29.87
LP-03-71	25.19	52.31	0.481552	0.13257	0.00414	7.06006	0.11627	0.38616	0.00592	2132.3	53.68	2119	14.65	2105	27.54
LP-03-72	130.23	183.67	0.709043	0.15681	0.00484	10.0447	0.15809	0.46447	0.00704	2421.6	51.46	2438.9	14.53	2459.3	30.98
LP-04
LP-04-01	304.04	370.24	0.821197	0.10403	0.00849	4.03972	0.36358	0.28176	0.01622	1697.2	143.2	1642.2	73.25	1600.2	81.56
LP-04-02	13.63	202.09	0.0674452	0.11953	0.00408	5.49018	0.29437	0.33328	0.01747	1949.2	59.7	1899.1	46.05	1854.3	84.48
LP-04-03	365.9	520.34	0.703194	0.05511	0.00245	0.51357	0.03106	0.06762	0.00355	416.6	96.17	420.8	20.84	421.8	21.46
LP-04-04	226.11	311.65	0.725525	0.14837	0.0055	8.50921	0.4719	0.41612	0.02203	2327.2	62.13	2286.9	50.39	2242.8	100.29
LP-04-05	1500.04	1057.89	1.41795	0.10879	0.0074	4.4872	0.36074	0.29927	0.01789	1779.2	119.25	1728.6	66.75	1687.7	88.78
LP-04-06	560.57	424.24	1.32135	0.12641	0.00406	2.71975	0.14241	0.15611	0.00815	2048.6	55.64	1333.9	38.87	935.1	45.42
LP-04-07	984.64	3599.3	0.273564	0.10849	0.0034	1.00983	0.05244	0.06753	0.00352	1774.1	56.18	708.8	26.49	421.3	21.24
LP-04-08	591.02	961.38	0.614762	0.10413	0.00327	1.14287	0.05941	0.07963	0.00415	1699	56.83	773.9	28.15	493.9	24.76
LP-04-09	50.38	46.38	1.08624	0.11037	0.00814	4.78478	0.3973	0.31454	0.01801	1805.5	128.42	1782.2	69.74	1763	88.32
LP-04-10	851.31	1153.71	0.737889	0.09142	0.00287	1.03304	0.05364	0.08199	0.00427	1455.2	58.58	720.4	26.79	508	25.42
LP-04-11	285.7	392.8	0.727342	0.1435	0.00439	5.80489	0.29886	0.2935	0.01527	2269.8	51.78	1947.1	44.59	1659	76.12
LP-04-12	51.27	73.55	0.697077	0.05535	0.00747	0.51281	0.0713	0.06721	0.00391	426.2	276	420.3	47.86	419.4	23.64
LP-04-13	1767.33	1347.55	1.31151	0.12633	0.00391	1.27678	0.06588	0.07333	0.00381	2047.5	53.63	835.4	29.38	456.2	22.9
LP-04-14	60.27	84.24	0.715456	0.15184	0.00513	8.8312	0.4706	0.42196	0.0221	2366.8	56.55	2320.7	48.6	2269.4	100.2
LP-04-15	136.93	314.84	0.434919	0.07302	0.00249	1.59336	0.08522	0.15831	0.00825	1014.6	67.61	967.6	33.37	947.4	45.89
LP-04-16	407.37	518.93	0.785019	0.05604	0.00261	0.56744	0.03508	0.07346	0.00386	453.6	100.52	456.4	22.73	457	23.17
LP-04-17	716.74	538.4	1.33124	0.15762	0.00488	3.626	0.18701	0.16689	0.00868	2430.3	51.55	1555.3	41.05	995	47.94
LP-04-18	349.35	2195.11	0.159149	0.11436	0.0035	2.41039	0.12391	0.15291	0.00794	1869.8	54.28	1245.7	36.89	917.3	44.39
LP-04-19	142.5	345.56	0.412374	0.13936	0.00764	7.82211	0.5328	0.40719	0.02288	2219.3	92.01	2210.8	61.32	2202	104.82
LP-04-20	72.53	139.13	0.521311	0.1161	0.0038	5.52365	0.29049	0.34515	0.01798	1897	57.7	1904.3	45.21	1911.4	86.17
LP-04-21	97.11	85.77	1.13221	0.16267	0.00526	9.73277	0.50929	0.43404	0.02264	2483.6	53.47	2409.8	48.18	2323.9	101.78
LP-04-22	59.36	93.49	0.634934	0.14067	0.00464	7.86298	0.41456	0.4055	0.02116	2235.5	55.99	2215.4	47.49	2194.3	97.05
LP-04-23	320.04	536.13	0.596945	0.12246	0.00425	5.58805	0.30029	0.33104	0.01731	1992.3	60.46	1914.3	46.28	1843.4	83.85
LP-04-24	66.46	82.65	0.804114	0.15262	0.00501	8.92125	0.46913	0.42403	0.02211	2375.5	54.94	2330	48.01	2278.7	100.11
LP-04-25	309.13	754.13	0.409916	0.13123	0.00455	6.78402	0.36437	0.375	0.01963	2114.5	59.51	2083.6	47.53	2052.9	92.05
LP-04-26	198.05	660.72	0.299749	0.11689	0.00474	5.50108	0.31622	0.34139	0.01808	1909.2	70.97	1900.8	49.39	1893.4	86.87
LP-04-27	213.64	310.1	0.688939	0.15209	0.00513	8.81106	0.46824	0.42025	0.02199	2369.6	56.47	2318.6	48.46	2261.6	99.79
LP-04-28	591.27	705.15	0.838502	0.13746	0.00509	7.7894	0.43099	0.41105	0.02171	2195.5	62.93	2207	49.79	2219.7	99.2
LP-04-29	73.6	458.39	0.160562	0.26284	0.00788	21.5617	1.09749	0.59508	0.03085	3263.8	46.36	3164.2	49.39	3010	124.66
LP-04-30	89.91	201.99	0.445121	0.14235	0.00451	7.57767	0.39272	0.38616	0.02006	2255.9	53.65	2182.2	46.49	2105	93.28
LP-04-31	64.87	62.42	1.03925	0.15852	0.00533	9.89374	0.52412	0.45273	0.02364	2440	55.86	2424.9	48.85	2407.4	104.89
LP-04-32	16.11	28.38	0.567653	0.11262	0.00511	5.2687	0.31972	0.33934	0.01802	1842.2	79.89	1863.8	51.79	1883.5	86.71
LP-04-33	273.74	217.52	1.25846	0.13472	0.00502	3.37652	0.18593	0.1818	0.00952	2160.4	63.61	1499	43.14	1076.8	51.93
LP-04-34	253.6	208.35	1.21718	0.14476	0.00609	8.56839	0.50156	0.42934	0.02296	2284.9	70.68	2293.2	53.23	2302.7	103.54
LP-04-35	77.12	236.67	0.325855	0.15773	0.0051	5.79356	0.30185	0.26643	0.01385	2431.5	53.74	1945.4	45.12	1522.7	70.47
LP-04-36	103.51	158.82	0.651744	0.14889	0.00512	8.65044	0.46153	0.42141	0.022	2333.2	57.76	2301.9	48.56	2266.9	99.79
LP-04-37	352.47	357.55	0.985792	0.1221	0.00382	3.1047	0.15982	0.18443	0.00955	1987.1	54.6	1433.9	39.54	1091.2	51.95
LP-04-38	92.69	189.25	0.489775	0.12487	0.004	6.02929	0.31303	0.35022	0.01816	2027	55.61	1980.1	45.22	1935.6	86.69
LP-04-39	251.11	219.42	1.14443	0.11324	0.00357	4.83579	0.2498	0.30974	0.01604	1852.1	56	1791.1	43.46	1739.4	78.93
LP-04-40	983.88	779.83	1.26166	0.14135	0.00539	7.9983	0.44831	0.41042	0.02177	2243.8	64.49	2230.8	50.59	2216.8	99.5
LP-04-41	46.83	54.52	0.858951	0.11461	0.00432	5.53535	0.30658	0.3503	0.01832	1873.8	66.46	1906.1	47.63	1936.1	87.48
LP-04-42	208.49	506.02	0.412019	0.10784	0.0035	4.23287	0.22072	0.28468	0.01473	1763.3	58.11	1680.4	42.83	1614.9	73.94
LP-04-43	62.29	95.73	0.650684	0.16129	0.00516	10.1593	0.52673	0.45684	0.0237	2469.2	53.02	2449.4	47.93	2425.6	104.88
LP-04-44	33.11	487.38	0.0679347	0.12169	0.0038	5.80376	0.2983	0.3459	0.01789	1981.2	54.59	1947	44.52	1915	85.67
LP-04-45	407.23	408.62	0.996598	0.16642	0.00541	4.76626	0.2481	0.20773	0.01078	2521.9	53.61	1779	43.69	1216.7	57.52
LP-04-46	155.76	524.72	0.296844	0.12035	0.00403	5.34508	0.28171	0.32211	0.01672	1961.5	58.55	1876.1	45.08	1800	81.51
LP-04-47	207.26	183.17	1.13152	0.16046	0.00551	9.59533	0.5104	0.43371	0.02261	2460.5	56.86	2396.7	48.91	2322.4	101.67
LP-04-48	171.1	340.86	0.501966	0.14121	0.00434	7.92169	0.40431	0.40685	0.02101	2242.1	52.13	2222.2	46.01	2200.5	96.26
LP-04-49	162.16	507.37	0.319609	0.17439	0.00573	11.1333	0.58235	0.46301	0.02408	2600.2	53.74	2534.4	48.73	2452.8	106.1
LP-04-50	303	563.24	0.537959	0.11306	0.0036	4.79678	0.24787	0.30769	0.0159	1849.2	56.52	1784.3	43.42	1729.3	78.37
LP-04-51	387.72	381.28	1.01689	0.17445	0.00548	6.50667	0.33421	0.27049	0.01399	2600.8	51.43	2046.8	45.21	1543.3	70.96
LP-04-52	228.8	292.51	0.782195	0.12464	0.00385	5.89907	0.30134	0.34324	0.01771	2023.7	53.67	1961.1	44.35	1902.2	84.98
LP-04-53	18.23	160.77	0.113392	0.11225	0.00422	4.9561	0.27326	0.32021	0.01671	1836.1	66.57	1811.9	46.58	1790.8	81.59
LP-04-54	218.22	1232.03	0.177122	0.11253	0.00346	3.64893	0.18609	0.23515	0.01212	1840.7	54.69	1560.3	40.64	1361.4	63.25
LP-04-55	86.24	107.33	0.803503	0.16669	0.00545	10.3774	0.5407	0.45148	0.02342	2524.7	53.9	2469	48.26	2401.8	103.99
LP-04-56	255.88	646.16	0.396001	0.11774	0.00374	4.64623	0.23937	0.28617	0.01477	1922.3	55.8	1757.6	43.05	1622.3	74.03
LP-04-57	263.14	377.39	0.697263	0.14721	0.00451	5.7818	0.29418	0.28482	0.01468	2313.8	51.64	1943.7	44.04	1615.6	73.64
LP-04-58	118.5	247.23	0.479311	0.13312	0.00416	6.78208	0.34736	0.36945	0.01906	2139.6	53.58	2083.4	45.32	2026.8	89.7
LP-04-59	832.81	868.92	0.958443	0.15201	0.00477	4.45644	0.22849	0.2126	0.01097	2368.6	52.61	1722.9	42.52	1242.7	58.31
LP-04-60	91.03	222.95	0.408298	0.14672	0.00457	8.52594	0.43579	0.42139	0.02172	2308	52.49	2288.7	46.45	2266.8	98.53
LP-04-61	464.81	407.48	1.14069	0.12498	0.00389	3.58923	0.18343	0.20826	0.01072	2028.4	54.16	1547.2	40.59	1219.5	57.22
LP-04-62	92.02	295.7	0.311194	0.14879	0.00456	8.53213	0.43357	0.41581	0.02141	2332.1	51.55	2289.4	46.19	2241.4	97.48
LP-04-63	1230.7	2633.03	0.467408	0.1112	0.00341	1.89605	0.09632	0.12364	0.00636	1819.2	54.62	1079.7	33.77	751.5	36.47
LP-04-64	785.81	666.74	1.17859	0.11764	0.00364	2.31861	0.11811	0.14291	0.00735	1920.7	54.43	1218	36.14	861.1	41.46
LP-04-65	858.1	1110.72	0.772562	0.12097	0.00376	1.5429	0.07869	0.09249	0.00476	1970.5	54.36	947.7	31.42	570.2	28.07
LP-04-66	1870.46	1100.81	1.69917	0.11446	0.0036	1.36472	0.06985	0.08646	0.00445	1871.3	55.62	873.9	29.99	534.6	26.39
LP-04-67	68.75	76.85	0.8946	0.11836	0.00412	5.76576	0.30679	0.35324	0.01829	1931.6	60.99	1941.3	46.04	1950	87.13
LP-04-68	323.44	269.9	1.19837	0.155	0.00482	5.36306	0.27339	0.25088	0.01291	2401.8	51.91	1879	43.63	1443	66.54
LP-04-69	302.26	377.82	0.800011	0.12598	0.00416	4.85611	0.25299	0.2795	0.01442	2042.6	57.25	1794.7	43.87	1588.9	72.67
LP-04-70	126.15	174.3	0.723752	0.11359	0.00363	5.25031	0.27046	0.33513	0.01726	1857.7	56.71	1860.8	43.94	1863.2	83.31
LP-04-71	898.35	552.26	1.62668	0.13246	0.00426	2.27471	0.11723	0.12451	0.00641	2130.9	55.23	1204.5	36.35	756.5	36.75
LP-04-72	117.62	229.48	0.51255	0.11384	0.00356	4.89348	0.24999	0.31166	0.01602	1861.7	55.47	1801.1	43.07	1748.9	78.74
LP-04-73	54.33	68.78	0.78991	0.16322	0.00539	10.0207	0.18868	0.44533	0.00679	2489.3	54.61	2436.7	17.38	2374.5	30.29
LP-04-74	560.6	698.35	0.802749	0.05847	0.00297	0.43858	0.0184	0.05441	0.00091	547.4	107.41	369.2	12.99	341.5	5.54
LP-04-75	77.85	113.37	0.68669	0.0649	0.00262	1.08163	0.0315	0.12088	0.00183	771.2	82.67	744.4	15.36	735.7	10.53
LP-04-76	589.05	1186.65	0.496397	0.11917	0.00371	3.20318	0.04619	0.19496	0.00256	1943.9	54.63	1457.9	11.16	1148.2	13.81
LP-04-77	383.39	615.36	0.623034	0.14124	0.00512	2.5782	0.05975	0.13241	0.00205	2242.5	61.38	1294.5	16.96	801.6	11.69
LP-04-78	77.37	110.54	0.699928	0.12226	0.00519	6.04964	0.20187	0.35893	0.00736	1989.4	73.67	1983	29.08	1977.1	34.91
LP-04-79	129.79	186.59	0.695589	0.14851	0.00472	8.12879	0.13021	0.39702	0.00552	2328.9	53.44	2245.5	14.48	2155.3	25.45
LP-04-80	655.11	584.82	1.12019	0.15637	0.00497	8.89009	0.14567	0.41239	0.0059	2416.8	52.96	2326.8	14.96	2225.8	26.94
LP-04-81	118.74	63.02	1.88416	0.1151	0.00411	5.42717	0.12582	0.34201	0.00547	1881.5	63.04	1889.2	19.88	1896.3	26.29
LP-04-82	45.1	45.52	0.990773	0.11028	0.00412	4.61232	0.11771	0.30337	0.00501	1804	66.4	1751.5	21.3	1708	24.79
LP-04-83	60.09	96.17	0.624831	0.10814	0.00366	4.49403	0.08887	0.30143	0.00441	1768.3	60.6	1729.9	16.42	1698.4	21.85
LP-04-84	60.65	33.28	1.82242	0.12021	0.00477	5.66763	0.16523	0.34199	0.00629	1959.3	69.12	1926.5	25.16	1896.3	30.21
LP-04-85	127.41	81.97	1.55435	0.13575	0.00512	7.05707	0.18735	0.37708	0.00679	2173.7	64.28	2118.6	23.61	2062.6	31.77
LP-04-86	74.86	111.6	0.670789	0.162	0.00537	11.1849	0.21347	0.5008	0.00776	2476.7	54.83	2538.7	17.79	2617.2	33.32
LP-04-87	420.56	351.61	1.1961	0.14796	0.00475	4.61275	0.07556	0.22614	0.00313	2322.4	54.01	1751.6	13.67	1314.2	16.43
LP-04-88	180.5	198.9	0.907491	0.11351	0.00376	5.36412	0.09953	0.34279	0.00495	1856.3	58.67	1879.1	15.88	1900.1	23.76
LP-04-89	63.64	99.24	0.641274	0.11872	0.00393	5.82392	0.1082	0.35582	0.00517	1937.1	58.1	1950	16.1	1962.3	24.57
LP-04-90	41.31	218.56	0.18901	0.12343	0.00395	5.7118	0.09365	0.33565	0.00465	2006.5	55.78	1933.2	14.17	1865.7	22.42
LP-04-91	5163.59	2185.21	2.36297	0.14432	0.00466	1.3314	0.02194	0.06691	0.00091	2279.7	54.57	859.5	9.56	417.5	5.49
LP-04-92	367.55	242.22	1.51742	0.13996	0.00449	4.98225	0.0818	0.25821	0.00358	2226.7	54.53	1816.3	13.88	1480.7	18.32
LP-04-93	312.33	346.56	0.901229	0.05555	0.00216	0.5151	0.0139	0.06726	0.00096	434	84.33	421.9	9.31	419.6	5.82
LP-04-94	156.39	400.04	0.390936	0.14363	0.00464	7.60181	0.12964	0.3839	0.00548	2271.4	54.63	2185.1	15.3	2094.5	25.52
LP-04-95	68.71	41.19	1.66812	0.11868	0.00439	5.3052	0.13285	0.32425	0.00541	1936.4	64.75	1869.7	21.39	1810.5	26.32
LP-04-96	316.27	407.33	0.776447	0.14527	0.00816	8.01685	0.42509	0.40027	0.01354	2291	93.49	2232.9	47.87	2170.3	62.34
LP-04-97	145.41	167.66	0.867291	0.12031	0.00385	6.01431	0.09808	0.36259	0.00502	1960.8	55.98	1977.9	14.2	1994.4	23.76
LP-04-98	67.72	421.93	0.160501	0.12291	0.00384	5.99806	0.08786	0.35395	0.00473	1998.9	54.47	1975.6	12.75	1953.5	22.51
LP-04-99	245.29	303.63	0.807858	0.12786	0.0045	6.26748	0.14063	0.35553	0.0057	2068.8	60.73	2013.9	19.65	1961	27.13
LP-04-100	1081.4	673.26	1.60621	0.14146	0.00487	8.16992	0.17865	0.4189	0.00706	2245.2	58.35	2250	19.78	2255.5	32.06
LP-04-101	193.03	367.61	0.525095	0.12885	0.00437	6.52705	0.13128	0.36743	0.0056	2082.3	58.53	2049.6	17.71	2017.3	26.4
LP-04-102	55.8	40.79	1.36798	0.11711	0.00447	5.45127	0.14593	0.33762	0.00573	1912.6	66.88	1893	22.97	1875.2	27.64
LP-04-103	796.07	1014.65	0.784576	0.13225	0.00427	2.57684	0.04276	0.14133	0.00194	2128	55.48	1294.1	12.14	852.2	10.95
LP-04-104	777.54	724.79	1.07278	0.15441	0.00486	3.3915	0.05101	0.1593	0.00214	2395.4	52.61	1502.4	11.79	952.9	11.9
LP-04-105	88.77	517.37	0.171579	0.1203	0.00391	6.09317	0.10551	0.36737	0.00521	1960.6	56.84	1989.3	15.1	2017	24.58
LP-04-106	157.84	626.15	0.25208	0.12598	0.00415	6.4321	0.11968	0.37033	0.00558	2042.6	57.09	2036.7	16.35	2030.9	26.25
LP-04-107	391.88	356.58	1.099	0.12597	0.00472	4.11214	0.1043	0.23676	0.00393	2042.5	64.77	1656.7	20.72	1369.8	20.46
LP-04-108	190.43	241.25	0.789347	0.11292	0.00364	4.84699	0.08064	0.31132	0.00432	1846.9	57.15	1793.1	14	1747.2	21.23
LP-04-109	69.58	124.73	0.557845	0.12226	0.00403	5.56332	0.10066	0.33004	0.00476	1989.4	57.45	1910.4	15.57	1838.6	23.05
LP-04-110	124.17	114.52	1.08426	0.16363	0.00525	10.6112	0.17734	0.47032	0.00677	2493.6	53.08	2489.7	15.51	2485	29.7
LP-04-111	217.73	291.46	0.747032	0.11338	0.00361	5.44303	0.08622	0.34819	0.00477	1854.2	56.41	1891.7	13.59	1925.9	22.81
LP-04-112	41.19	75.17	0.547958	0.11794	0.00395	5.90263	0.11331	0.36299	0.00537	1925.2	58.8	1961.6	16.67	1996.3	25.38
LP-04-113	148.6	177.71	0.836194	0.16322	0.00515	9.86327	0.15181	0.43828	0.00606	2489.3	52.2	2422.1	14.19	2342.9	27.15
LP-04-114	106.4	357.96	0.29724	0.11664	0.00367	5.30414	0.08016	0.32981	0.00445	1905.3	55.5	1869.5	12.91	1837.5	21.59
LP-04-115	420.88	471.64	0.892376	0.13116	0.00428	2.75665	0.04747	0.15244	0.00212	2113.5	56.16	1343.9	12.83	914.6	11.88
LP-04-116	16.57	19.27	0.859886	0.10479	0.00516	4.32174	0.17852	0.2991	0.00657	1710.7	87.9	1697.5	34.06	1686.9	32.61
LP-04-117	129.79	104.74	1.23916	0.14423	0.00469	7.8715	0.13683	0.39582	0.00572	2278.5	54.93	2216.4	15.66	2149.8	26.44
LP-04-118	52.8	72.01	0.733231	0.16102	0.00524	9.8665	0.17308	0.44438	0.00654	2466.4	53.91	2422.4	16.17	2370.2	29.19
LP-04-119	293.34	432.2	0.678714	0.08661	0.00292	1.50943	0.02886	0.12639	0.00176	1351.9	63.65	934.2	11.68	767.2	10.1
LP-04-120	199.29	210.06	0.948729	0.05696	0.00228	0.55716	0.01593	0.07094	0.00104	489.3	86.65	449.7	10.39	441.8	6.27
LP-04-121	725.51	568.11	1.27706	0.12766	0.00468	2.34839	0.05561	0.13341	0.00208	2066	63.24	1227.1	16.86	807.3	11.81
LP-04-122	145.92	184.16	0.792354	0.14481	0.00521	8.02416	0.19219	0.40184	0.007	2285.5	60.62	2233.7	21.62	2177.5	32.19
LP-04-123	423.41	549.05	0.771168	0.14226	0.00458	4.03073	0.06601	0.20548	0.00285	2254.9	54.51	1640.4	13.32	1204.7	15.24
LP-04-124	43.85	90.53	0.48437	0.1458	0.00483	8.55783	0.15935	0.42566	0.00639	2297.2	55.84	2292.1	16.93	2286.1	28.91
LP-04-125	148.07	217.54	0.680656	0.16989	0.00537	10.7424	0.16664	0.45856	0.00639	2556.5	51.97	2501.1	14.41	2433.2	28.24
LP-04-126	64.34	124.37	0.517327	0.10779	0.00366	4.71262	0.09361	0.31705	0.00469	1762.5	60.78	1769.5	16.64	1775.3	22.98
LP-04-127	1018.21	1138.5	0.894343	0.1585	0.00531	9.72844	0.19499	0.44512	0.00725	2439.7	55.66	2409.4	18.45	2373.5	32.32
LP-04-128	171.57	133.11	1.28893	0.1214	0.00397	6.02876	0.10614	0.36014	0.00516	1976.8	57.11	1980	15.33	1982.8	24.48
LP-04-129	272.82	591.48	0.46125	0.12955	0.00493	6.78298	0.18652	0.37969	0.0072	2091.8	65.41	2083.5	24.33	2074.8	33.65
LP-04-130	208.77	292.22	0.714427	0.14417	0.00478	5.35004	0.09841	0.26911	0.00394	2277.8	56.05	1876.9	15.74	1536.3	20
LP-04-131	236.46	445.91	0.530286	0.14163	0.0054	7.53023	0.20342	0.38556	0.0071	2247.2	64.37	2176.6	24.21	2102.2	33.04
LP-04-132	69.26	110.13	0.628893	0.10463	0.0037	4.41167	0.09779	0.30574	0.00472	1707.9	63.56	1714.5	18.35	1719.7	23.31
LP-04-133	96.81	168.97	0.572942	0.15243	0.00496	8.97831	0.15637	0.4271	0.00624	2373.4	54.43	2335.8	15.91	2292.6	28.19
LP-04-134	119.94	100.8	1.18988	0.16966	0.00771	10.2258	0.38989	0.43706	0.01108	2554.2	74.16	2455.4	35.27	2337.5	49.72
LP-04-135	185.37	64.35	2.88065	0.11711	0.00411	5.86381	0.12858	0.36307	0.00572	1912.6	61.64	1955.9	19.02	1996.7	27.08
LP-04-136	254.84	732.33	0.347985	0.12123	0.00382	5.8723	0.08879	0.35124	0.0048	1974.4	55.07	1957.1	13.12	1940.5	22.89
LP-04-137	185.5	238.43	0.778006	0.15514	0.00535	8.8781	0.19	0.41496	0.00685	2403.3	57.43	2325.6	19.53	2237.6	31.21
LP-04-138	812.66	672.29	1.20879	0.14556	0.00522	8.65843	0.21551	0.43131	0.00817	2294.4	60.38	2302.7	22.66	2311.6	36.8
LP-04-139	187.57	191.09	0.981579	0.11894	0.00381	5.57907	0.09065	0.34012	0.00473	1940.3	56.26	1912.9	13.99	1887.3	22.78
LP-04-140	558.6	731.16	0.763991	0.1526	0.00483	7.03622	0.10798	0.33433	0.0046	2375.3	52.95	2116	13.64	1859.3	22.23
LP-04-141	149.19	118.08	1.26347	0.15439	0.00506	9.39337	0.16864	0.44115	0.00656	2395.1	54.73	2377.2	16.48	2355.8	29.36
LP-04-142	38.11	66.24	0.575332	0.13925	0.00472	7.73042	0.1548	0.40253	0.00623	2217.8	57.63	2200.1	18	2180.7	28.65
LP-04-143	151.1	185.38	0.815083	0.14573	0.00625	7.93638	0.27117	0.39488	0.0087	2296.3	71.99	2223.8	30.81	2145.4	40.23
LP-04-144	90.7	193.26	0.469316	0.14251	0.00462	7.84452	0.13445	0.3991	0.00576	2257.9	54.94	2213.3	15.44	2164.9	26.52
LP-04-145	136.44	165.17	0.826058	0.15253	0.00485	8.67698	0.13714	0.41244	0.00577	2374.5	53.25	2304.7	14.39	2226.1	26.34
LP-04-146	574	472.67	1.21438	0.13374	0.00464	2.10464	0.04332	0.1141	0.00169	2147.6	59.44	1150.3	14.17	696.5	9.77
LP-04-147	522.72	392.43	1.33201	0.12249	0.00445	5.94856	0.14352	0.3521	0.00595	1992.8	63.15	1968.4	20.97	1944.6	28.36
LP-04-148	318.59	1236.71	0.257611	0.12527	0.00403	5.99558	0.09919	0.34701	0.00493	2032.6	55.81	1975.2	14.4	1920.3	23.57
LP-04-149	121.82	80.44	1.51442	0.11881	0.00398	5.87641	0.11165	0.35859	0.00531	1938.4	58.69	1957.8	16.49	1975.5	25.2
LP-04-150	256.76	475.32	0.540183	0.06173	0.0023	0.58742	0.01439	0.06899	0.00099	664.8	77.78	469.2	9.21	430.1	6
LP-04-151	84.69	103.27	0.820083	0.05167	0.00284	0.3736	0.01747	0.05242	0.00089	270.7	121.4	322.3	12.92	329.4	5.46
LP-04-152	416.94	607.8	0.685982	0.12642	0.00416	1.82071	0.03191	0.10441	0.00146	2048.8	57.02	1052.9	11.49	640.2	8.55
LP-04-153	171.63	310.84	0.552149	0.13207	0.00596	6.64768	0.25444	0.36492	0.00912	2125.6	76.9	2065.7	33.78	2005.4	43.08
LP-04-154	209.61	326.32	0.642345	0.14118	0.00462	5.20229	0.09059	0.26714	0.00383	2241.7	55.47	1853	14.83	1526.3	19.5
LP-04-155	250.49	403.91	0.620163	0.07617	0.00252	1.61662	0.02904	0.15386	0.00214	1099.6	64.81	976.7	11.27	922.6	11.94
LP-04-156	390.03	1116.91	0.349205	0.14378	0.00555	8.14617	0.23304	0.41072	0.00828	2273.2	65.07	2247.4	25.87	2218.2	37.85
LP-04-157	72.73	89.44	0.813171	0.1154	0.00386	5.55422	0.1047	0.3489	0.00514	1886.1	58.97	1909	16.22	1929.4	24.57
LP-04-158	375.82	673.98	0.557613	0.10919	0.00367	2.13424	0.04003	0.14168	0.00202	1786	59.99	1160	12.97	854.2	11.42
LP-04-159	40.03	62.55	0.639968	0.11186	0.00404	4.95479	0.11599	0.32109	0.00516	1829.8	64.04	1811.6	19.78	1795	25.16
LP-04-160	233.37	1314.06	0.177595	0.09277	0.00298	1.14288	0.01843	0.0893	0.00122	1483	59.83	773.9	8.73	551.4	7.22
LP-04-161	67.96	101.13	0.672006	0.05649	0.00273	0.55154	0.02151	0.07077	0.00116	471.1	104.29	446	14.08	440.8	6.97
LP-04-162	434.38	271.18	1.60181	0.12445	0.00516	1.27848	0.03825	0.07446	0.00126	2021	71.73	836.2	17.04	463	7.56
LP-04-163	85.38	68.17	1.25246	0.15136	0.005	9.09519	0.16702	0.43555	0.00655	2361.3	55.34	2347.6	16.8	2330.7	29.43
LP-04-164	540.61	912.33	0.59256	0.06165	0.00268	0.60588	0.0199	0.07123	0.00112	662	90.36	481	12.58	443.6	6.73
LP-04-165	37.75	28.18	1.3396	0.12338	0.00511	6.2459	0.19709	0.36694	0.00721	2005.6	71.75	2010.9	27.62	2015	34.02
LP-04-166	61.67	789.8	0.0780831	0.10007	0.0034	1.52426	0.02958	0.11041	0.00158	1625.3	61.91	940.2	11.9	675.1	9.16
LP-04-167	100.89	157.51	0.640531	0.05666	0.00244	0.55062	0.01782	0.07044	0.00108	477.6	93	445.4	11.67	438.8	6.52
LP-04-168	190.94	226.44	0.843226	0.15834	0.00536	9.7398	0.19857	0.44583	0.00732	2438	56.19	2410.5	18.77	2376.7	32.64
LP-05
LP-05-01	154.97	236.18	0.656152	0.05246	0.00172	0.35365	0.00719	0.04891	0.00083	305.5	73.05	307.5	5.39	307.8	5.09
LP-05-02	271.59	351.6	0.77244	0.05873	0.00198	0.42811	0.00922	0.05289	0.0009	557.1	71.78	361.8	6.56	332.2	5.53
LP-05-03	183.03	237.78	0.769745	0.05857	0.00196	0.41639	0.00883	0.05158	0.00088	551.1	71.38	353.5	6.33	324.2	5.39
LP-05-04	97.16	243.41	0.399162	0.15578	0.00485	8.89044	0.15552	0.41406	0.00697	2410.4	51.9	2326.8	15.97	2233.5	31.75
LP-05-05	155.07	250.71	0.618523	0.05488	0.0025	0.40655	0.01512	0.05375	0.00098	407.2	98.55	346.4	10.92	337.5	6.02
LP-05-06	46.68	75.36	0.619427	0.16546	0.00516	11.0471	0.19569	0.48439	0.00819	2512.2	51.53	2527.1	16.49	2546.4	35.57
LP-05-07	178.44	333.78	0.534604	0.0639	0.00207	0.69736	0.01375	0.07917	0.00134	738.4	67.2	537.2	8.22	491.2	8.03
LP-05-08	171.32	224.31	0.763764	0.05752	0.00185	0.58005	0.01125	0.07316	0.00124	511.2	69.69	464.5	7.23	455.2	7.44
LP-05-09	119.36	182.47	0.654135	0.05524	0.00188	0.3868	0.00857	0.0508	0.00087	421.6	73.84	332	6.28	319.5	5.33
LP-05-10	83.09	134.04	0.61989	0.05582	0.00229	0.34692	0.01098	0.04509	0.00081	444.9	88.7	302.4	8.28	284.3	4.98
LP-05-11	34.82	46.58	0.747531	0.1082	0.00347	4.98043	0.09577	0.33395	0.00574	1769.2	57.48	1816	16.26	1857.5	27.74
LP-05-12	313.52	366.08	0.856425	0.05687	0.00181	0.53811	0.01007	0.06864	0.00116	485.9	69.34	437.2	6.65	428	6.99
LP-05-13	245.24	574.41	0.426942	0.05733	0.00181	0.54088	0.00994	0.06844	0.00116	503.7	68.47	439	6.55	426.8	6.97
LP-05-14	163.27	220.26	0.74126	0.05457	0.00183	0.35681	0.00769	0.04743	0.00081	394.8	72.88	309.8	5.76	298.7	4.98
LP-05-15	92.21	217.9	0.423176	0.05543	0.0018	0.54251	0.01073	0.07101	0.00121	429.1	70.43	440.1	7.06	442.2	7.25
LP-05-16	216.56	302.13	0.716778	0.05381	0.00175	0.36443	0.00728	0.04913	0.00083	362.9	71.6	315.5	5.42	309.2	5.12
LP-05-17	219.78	215.85	1.01821	0.06549	0.00223	0.39434	0.00878	0.04368	0.00075	790.2	69.93	337.5	6.39	275.6	4.64
LP-05-18	103.52	155.44	0.66598	0.05659	0.00234	0.37079	0.01186	0.04753	0.00085	474.7	89.55	320.2	8.78	299.4	5.25
LP-05-19	202.97	177.69	1.14227	0.05668	0.00195	0.36825	0.00838	0.04713	0.00081	478.5	74.89	318.4	6.22	296.9	4.98
LP-05-20	205.58	337.44	0.609234	0.05689	0.00185	0.37111	0.00739	0.04732	0.0008	486.5	70.77	320.5	5.47	298.1	4.95
LP-05-21	133.76	160.54	0.833188	0.05372	0.00184	0.36796	0.00834	0.04968	0.00085	359.3	75.4	318.1	6.19	312.6	5.23
LP-05-22	77.69	202.76	0.383162	0.05938	0.00195	0.59713	0.01219	0.07294	0.00124	581.1	69.65	475.4	7.75	453.9	7.47
LP-05-23	262.26	522.43	0.502	0.06267	0.00211	0.63737	0.01381	0.07378	0.00127	696.9	70.04	500.7	8.56	458.9	7.62
LP-05-24	135.18	334.5	0.404126	0.05799	0.00183	0.69036	0.01283	0.08635	0.00146	529	68.2	533	7.71	533.9	8.67
LP-05-25	521.38	757.04	0.688709	0.06058	0.00199	0.51203	0.01057	0.06131	0.00105	624.3	69.42	419.8	7.1	383.6	6.37
LP-05-26	61.4	94.68	0.6485	0.15836	0.00501	9.35096	0.17588	0.42831	0.00743	2438.2	52.62	2373	17.25	2298.1	33.52
LP-05-27	240.17	302.21	0.794712	0.05583	0.00193	0.39332	0.00907	0.0511	0.00088	445.3	75.03	336.8	6.61	321.3	5.4
LP-05-28	306.61	358.67	0.854853	0.0522	0.00169	0.35001	0.00698	0.04864	0.00083	294	72.24	304.7	5.25	306.1	5.08
LP-05-29	134.81	297.5	0.453143	0.10985	0.0034	4.99233	0.08754	0.32963	0.00557	1796.9	55.28	1818	14.83	1836.6	27
LP-05-30	51.75	82.3	0.628797	0.05744	0.00237	0.39971	0.01281	0.05048	0.00091	507.9	88.69	341.4	9.3	317.5	5.55
LP-05-31	171.77	252.14	0.681249	0.05145	0.00173	0.34557	0.00749	0.04872	0.00083	261.1	75.22	301.4	5.66	306.6	5.12
LP-05-32	141.27	181.32	0.77912	0.05335	0.00181	0.35812	0.00793	0.04869	0.00083	343.6	74.72	310.8	5.93	306.5	5.13
LP-05-33	283.5	239.74	1.18253	0.05261	0.00174	0.34825	0.00732	0.04802	0.00082	311.8	73.53	303.4	5.51	302.3	5.04
LP-05-34	154.41	242.85	0.635825	0.0584	0.00187	0.5799	0.01127	0.07203	0.00123	544.6	68.59	464.4	7.25	448.4	7.37
LP-05-35	175.87	410.75	0.428168	0.05583	0.00179	0.36994	0.00717	0.04806	0.00082	445.3	69.67	319.6	5.31	302.6	5.02
LP-05-36	137.17	301.86	0.454416	0.05595	0.00178	0.55167	0.01055	0.07151	0.00121	450.2	69.35	446.1	6.91	445.2	7.31
LP-05-37	88.61	316.41	0.280048	0.05625	0.00179	0.57591	0.01092	0.07425	0.00126	461.6	69.19	461.8	7.04	461.7	7.57
LP-05-38	161.13	501.09	0.321559	0.05991	0.00188	0.58815	0.01088	0.07121	0.00121	600.2	66.67	469.7	6.96	443.4	7.27
LP-05-39	387.58	429.99	0.90137	0.05683	0.00179	0.55198	0.01024	0.07044	0.00119	484.4	68.68	446.3	6.7	438.8	7.19
LP-05-40	347.43	365.88	0.949574	0.0559	0.00179	0.37484	0.00734	0.04863	0.00083	448.2	69.86	323.2	5.42	306.1	5.09
LP-05-41	100.59	165.55	0.607611	0.05645	0.00185	0.56831	0.01173	0.07302	0.00125	469.3	71.04	456.9	7.59	454.3	7.5
LP-05-42	51.6	97.39	0.529829	0.05649	0.00209	0.39046	0.01044	0.05013	0.00088	471	80.72	334.7	7.62	315.3	5.38
LP-05-43	107.94	213.67	0.505172	0.05787	0.00186	0.55649	0.01095	0.06975	0.00119	524.4	69.34	449.2	7.14	434.6	7.17
LP-05-44	267.74	507.3	0.527774	0.05817	0.00231	0.47572	0.01434	0.05931	0.00107	535.7	85.17	395.1	9.86	371.4	6.51
LP-05-45	114.23	182.03	0.627534	0.05284	0.00178	0.36528	0.00803	0.05013	0.00086	321.9	74.73	316.1	5.97	315.3	5.28
LP-05-46	242.83	403.26	0.602167	0.05648	0.00184	0.39412	0.008	0.05061	0.00087	470.6	70.5	337.4	5.83	318.2	5.31
LP-05-47	200.04	354.78	0.563842	0.05289	0.0017	0.374	0.00733	0.05128	0.00087	324	71.27	322.6	5.42	322.4	5.36
LP-05-48	153.88	447.28	0.344035	0.0578	0.00181	0.55107	0.01016	0.06915	0.00117	521.8	67.52	445.7	6.65	431	7.08
LP-05-49	407.39	362.93	1.1225	0.05568	0.00185	0.35972	0.00773	0.04685	0.00081	439.2	72.35	312	5.77	295.2	4.96
LP-05-50	188.61	301.05	0.626507	0.05559	0.00176	0.53673	0.01023	0.07002	0.00119	435.6	68.9	436.3	6.76	436.3	7.18
LP-05-51	114.89	177.73	0.64643	0.05727	0.002	0.40173	0.0096	0.05087	0.00088	501.3	75.63	342.9	6.95	319.9	5.42
LP-05-52	205.24	232.17	0.884007	0.05236	0.00173	0.34776	0.00735	0.04817	0.00083	301.1	73.45	303	5.54	303.3	5.08
LP-05-53	216.4	320.47	0.675258	0.05779	0.00189	0.38677	0.00797	0.04853	0.00083	521.7	70.98	332	5.83	305.5	5.11
LP-05-54	139.59	165.21	0.844925	0.05603	0.0019	0.36962	0.00825	0.04784	0.00082	453.2	73.41	319.4	6.12	301.2	5.07
LP-05-55	176.68	586.61	0.301188	0.05618	0.00175	0.54699	0.00996	0.07061	0.0012	458.7	68.06	443	6.54	439.8	7.22
LP-05-56	106.57	178.56	0.59683	0.05345	0.0018	0.35343	0.00786	0.04795	0.00083	347.8	74.44	307.3	5.9	301.9	5.08
LP-05-57	275.53	776.78	0.354708	0.061	0.00192	0.62406	0.01172	0.07419	0.00126	639.2	66.32	492.4	7.33	461.4	7.59
LP-05-58	84.31	118.5	0.711477	0.05814	0.00234	0.39073	0.01205	0.04873	0.00088	534.5	86.15	334.9	8.8	306.7	5.41
LP-05-59	265.51	324.72	0.817658	0.05449	0.00176	0.37791	0.00756	0.05029	0.00086	391.3	70.03	325.5	5.57	316.3	5.28
LP-05-60	219.58	265.63	0.826639	0.10909	0.00347	4.35342	0.08457	0.2894	0.00503	1784.2	56.93	1703.5	16.04	1638.5	25.15
LP-05-61	72.47	73.53	0.985584	0.05016	0.0022	0.36873	0.01306	0.05331	0.00097	202.2	98.6	318.7	9.69	334.8	5.92
LP-05-62	85.92	171.45	0.501137	0.05653	0.00184	0.5664	0.01161	0.07265	0.00125	472.6	71.13	455.7	7.53	452.1	7.49
LP-05-63	148.58	111.53	1.3322	0.09065	0.00334	0.80781	0.02139	0.06462	0.00117	1439.2	68.79	601.2	12.01	403.7	7.07
LP-05-64	53.67	54.38	0.986944	0.14622	0.00531	1.02877	0.02622	0.05102	0.00094	2302.2	61.1	718.3	13.12	320.8	5.76
LP-05-65	160.57	228.2	0.703637	0.05137	0.00169	0.32657	0.00691	0.04609	0.00079	257.6	73.95	286.9	5.29	290.5	4.88
LP-05-66	165.06	174.07	0.948239	0.05292	0.00178	0.37544	0.00829	0.05144	0.00089	325.5	74.62	323.7	6.12	323.4	5.43
LP-05-67	99.27	257.86	0.384976	0.08262	0.00265	1.01822	0.02025	0.08937	0.00154	1260.2	61.45	713	10.19	551.8	9.12
LP-05-68	134.07	273.82	0.489628	0.05635	0.00186	0.37288	0.00789	0.04799	0.00083	465.3	71.52	321.8	5.84	302.1	5.08
LP-05-69	180.27	246.91	0.730104	0.05201	0.0017	0.34408	0.00719	0.04797	0.00082	285.9	73.1	300.3	5.43	302	5.07
LP-05-70	140.16	254.1	0.551594	0.05145	0.00168	0.32397	0.00668	0.04566	0.00078	261	73.06	285	5.12	287.8	4.83
LP-05-71	243.4	306.26	0.79475	0.05289	0.0017	0.34321	0.0069	0.04706	0.00081	323.8	71.6	299.6	5.22	296.4	4.96
LP-05-72	116.94	189.08	0.618468	0.05909	0.00192	0.61032	0.01254	0.07489	0.00129	570.5	69.19	483.8	7.91	465.6	7.73
LP-05-73	94.62	188.56	0.501803	0.05336	0.00209	0.35996	0.01089	0.04916	0.00087	343.9	86.19	312.2	8.13	309.4	5.36
LP-05-74	159.67	112.95	1.41363	0.05275	0.00228	0.31868	0.01118	0.04402	0.0008	318.1	95.31	280.9	8.61	277.7	4.94
LP-05-75	153.21	171.9	0.891274	0.05524	0.00231	0.34329	0.01146	0.04528	0.00082	421.6	90.52	299.7	8.66	285.5	5.05
LP-05-76	243.83	312.36	0.780606	0.05529	0.00208	0.37568	0.0106	0.04951	0.00087	423.6	81.6	323.9	7.82	311.5	5.36
LP-05-77	104.86	188.8	0.555403	0.05358	0.00184	0.35556	0.00849	0.04835	0.00083	353.2	75.65	308.9	6.36	304.4	5.1
LP-05-78	262.47	377.44	0.695395	0.05044	0.00166	0.32081	0.00696	0.04634	0.00079	215.3	74.3	282.5	5.35	292	4.85
LP-05-79	252.93	272.63	0.927741	0.0538	0.00183	0.36003	0.00838	0.04874	0.00083	362.7	74.65	312.2	6.26	306.8	5.13
LP-05-80	273.51	423.26	0.646199	0.05345	0.00178	0.34216	0.00767	0.04663	0.00079	347.7	73.61	298.8	5.81	293.8	4.89
LP-05-81	228.43	577.07	0.395845	0.05528	0.00181	0.33934	0.00725	0.04471	0.00076	423.2	70.9	296.7	5.5	282	4.69
LP-05-82	156.45	202.17	0.773854	0.05601	0.00188	0.53415	0.01215	0.06945	0.00119	452.4	72.99	434.6	8.04	432.8	7.17
LP-05-83	163.5	200.36	0.816031	0.05471	0.00194	0.33822	0.00856	0.04502	0.00078	400.1	77.07	295.8	6.49	283.9	4.79
LP-05-84	394.74	564.33	0.699484	0.05517	0.00172	0.36112	0.00689	0.04767	0.0008	418.8	67.63	313	5.14	300.2	4.92
LP-05-85	263.86	312.42	0.844568	0.05381	0.0019	0.34476	0.00862	0.04665	0.0008	362.9	77.51	300.8	6.51	293.9	4.96
LP-05-86	90.78	186.62	0.486443	0.05497	0.00186	0.56091	0.01286	0.07428	0.00127	411.1	73.17	452.1	8.36	461.9	7.63
LP-05-87	70.1	148.19	0.473041	0.06083	0.00217	0.61995	0.01588	0.0742	0.00129	633.1	75.15	489.8	9.95	461.4	7.76
LP-05-88	26.15	35.72	0.732083	0.05718	0.00288	0.5175	0.0224	0.06588	0.00128	497.9	107.95	423.5	14.99	411.3	7.77
LP-05-89	321.29	308.12	1.04274	0.05228	0.00179	0.33981	0.008	0.04731	0.00081	297.8	76.13	297	6.06	298	4.97
LP-05-90	131.71	187.53	0.702341	0.05451	0.00216	0.37036	0.01137	0.04945	0.00088	392.2	86.04	319.9	8.42	311.2	5.4
LP-05-91	173	274.06	0.631249	0.05414	0.0018	0.36325	0.00801	0.04883	0.00083	376.9	72.83	314.6	5.96	307.3	5.09
LP-05-92	79.5	140.98	0.56391	0.05215	0.0024	0.33764	0.01291	0.04711	0.00087	292.2	101.74	295.4	9.8	296.8	5.33
LP-05-93	270.08	708.8	0.381038	0.0524	0.00163	0.34498	0.00652	0.04791	0.0008	302.9	69.31	300.9	4.92	301.7	4.94
LP-05-94	345.64	439.19	0.786994	0.07809	0.00585	0.604	0.0415	0.05628	0.00148	1149.3	141.79	479.8	26.27	353	9.02
LP-05-95	223.5	383.53	0.582745	0.05562	0.00205	0.56336	0.01518	0.07371	0.00129	436.8	79.9	453.7	9.86	458.5	7.74
LP-05-96	231.6	273.72	0.84612	0.05235	0.00181	0.33934	0.00812	0.04717	0.00081	300.7	76.79	296.7	6.15	297.1	4.97
LP-05-97	30.36	92.37	0.328678	0.05611	0.0029	0.54806	0.02447	0.07106	0.00138	456.3	110.98	443.7	16.05	442.6	8.3
LP-05-98	219.67	359.18	0.611588	0.05441	0.0018	0.52816	0.01155	0.07062	0.0012	387.9	72.01	430.6	7.68	439.9	7.22
LP-05-99	171.99	287.27	0.598705	0.0541	0.00172	0.51696	0.01028	0.06951	0.00117	375.1	69.89	423.1	6.88	433.2	7.04
LP-05-100	247.03	291.07	0.848696	0.05838	0.00209	0.38586	0.00988	0.04808	0.00083	543.9	76.52	331.3	7.24	302.7	5.13
LP-05-101	135.2	105.1	1.28639	0.05409	0.00215	0.36486	0.01115	0.04906	0.00087	374.8	86.26	315.8	8.3	308.8	5.32
LP-05-102	206.41	320.07	0.64489	0.0552	0.00182	0.36319	0.00786	0.04785	0.00081	420.3	71.64	314.6	5.85	301.3	4.98
LP-05-103	147.8	290.48	0.508813	0.05471	0.00176	0.5201	0.01055	0.06914	0.00116	400.1	69.77	425.2	7.05	431	7.01
LP-05-104	113.25	192.36	0.58874	0.05237	0.00209	0.35857	0.01106	0.0498	0.00088	301.5	88.46	311.1	8.27	313.3	5.4
LP-05-105	89.76	548.68	0.163593	0.14603	0.00435	8.21388	0.13583	0.40904	0.00679	2299.9	50.34	2254.9	14.97	2210.5	31.08
LP-05-106	363.08	433.2	0.838135	0.05229	0.00208	0.33623	0.01032	0.04676	0.00083	298	88.34	294.3	7.84	294.6	5.1
LP-05-107	102.9	191.3	0.537899	0.05243	0.00272	0.34079	0.01531	0.04727	0.00091	304	114.12	297.8	11.59	297.7	5.57
LP-05-108	118.7	212.51	0.558562	0.05235	0.00207	0.35619	0.01077	0.04948	0.00087	300.6	87.53	309.4	8.07	311.3	5.36
LP-05-109	64.5	141.12	0.457058	0.08867	0.00271	2.95774	0.05268	0.24251	0.00406	1397	57.45	1396.8	13.51	1399.7	21.08
LP-05-110	148.14	507.74	0.291764	0.05309	0.00209	0.36331	0.01089	0.04974	0.00088	332.8	86.59	314.7	8.11	313	5.39
LP-05-111	177.73	372.21	0.477499	0.05442	0.00191	0.46782	0.01141	0.06249	0.00107	388.4	76.07	389.7	7.9	390.8	6.5
LP-05-112	99.34	250.92	0.395903	0.05537	0.00179	0.53064	0.01089	0.06966	0.00117	427	70.26	432.2	7.22	434.1	7.06
LP-05-113	284.87	343.79	0.828616	0.05199	0.00191	0.30949	0.00828	0.04327	0.00075	285.1	81.87	273.8	6.42	273.1	4.61
LP-05-114	58.9	79.7	0.739021	0.07439	0.00248	1.8393	0.04064	0.1797	0.0031	1052.2	65.81	1059.6	14.54	1065.3	16.94
LP-05-115	208.88	246.29	0.848106	0.0527	0.00216	0.35788	0.01149	0.04936	0.00087	315.7	90.67	310.6	8.59	310.6	5.37
LP-05-116	66	132.05	0.499811	0.05248	0.00195	0.36378	0.00992	0.05038	0.00087	306.4	82.53	315	7.39	316.8	5.33
LP-05-117	134.46	142.18	0.945703	0.16377	0.00494	10.199	0.17375	0.45258	0.00757	2494.9	49.93	2453	15.75	2406.7	33.6
LP-05-118	1560.28	998.67	1.56236	0.05717	0.00319	0.43473	0.02125	0.05525	0.00113	497.7	118.83	366.5	15.04	346.7	6.88
LP-05-119	104.15	313.27	0.332461	0.07331	0.00224	1.59876	0.02816	0.15846	0.00264	1022.6	60.65	969.7	11	948.2	14.67
LP-05-120	40.45	57.85	0.699222	0.19916	0.00604	14.5565	0.25216	0.53107	0.00897	2819.4	48.66	2786.7	16.46	2746	37.77
LP-05-121	441.9	380.43	1.16158	0.05213	0.00208	0.3293	0.01008	0.0459	0.00081	290.9	88.46	289	7.7	289.3	4.99
LP-05-122	346.19	406.21	0.852244	0.05328	0.00173	0.32949	0.00681	0.04492	0.00075	340.9	72.01	289.2	5.2	283.3	4.65
LP-05-123	260.9	330.39	0.789673	0.05115	0.0022	0.33158	0.01142	0.04709	0.00084	247.4	95.97	290.8	8.7	296.7	5.2
LP-05-124	212.56	439.33	0.483828	0.0556	0.00174	0.52012	0.00979	0.06795	0.00113	436.2	68.18	425.2	6.54	423.8	6.83
LP-05-125	75.97	243.44	0.312069	0.05424	0.00253	0.46713	0.01806	0.06255	0.00117	381	100.93	389.2	12.5	391.1	7.11
LP-05-126	346.35	360.41	0.960989	0.0522	0.00187	0.33636	0.00851	0.0468	0.0008	294.1	79.59	294.4	6.46	294.9	4.93
LP-05-127	217.47	514.43	0.42274	0.05627	0.00182	0.52335	0.01056	0.06755	0.00113	462.3	70.23	427.4	7.04	421.4	6.84
LP-05-128	210.79	249.6	0.844511	0.05058	0.00184	0.30128	0.00787	0.04326	0.00074	221.6	82.14	267.4	6.14	273	4.58
LP-05-129	99.22	139.92	0.709119	0.05243	0.0026	0.34666	0.01461	0.04802	0.00091	304	109.35	302.2	11.02	302.4	5.59
LP-05-130	167.02	221.5	0.754041	0.05147	0.00297	0.35006	0.01789	0.04939	0.00098	262.1	127.32	304.8	13.46	310.8	6.04
LP-05-131	53.91	81.46	0.661797	0.05199	0.00283	0.31252	0.01485	0.04365	0.00085	284.8	119.92	276.1	11.49	275.4	5.23
LP-05-132	221.66	285.03	0.777673	0.05343	0.0018	0.3294	0.0073	0.04477	0.00075	346.8	74.18	289.1	5.57	282.3	4.65
LP-05-133	177.36	551.63	0.32152	0.05616	0.00184	0.34736	0.00728	0.04491	0.00075	458.2	71.2	302.7	5.49	283.2	4.65
LP-05-134	34.27	41.91	0.817705	0.05234	0.00346	0.35105	0.02113	0.04869	0.00102	300.4	143.91	305.5	15.88	306.5	6.29
LP-05-135	103.15	151.03	0.682977	0.05481	0.00287	0.36433	0.01647	0.04826	0.00093	404.4	112.96	315.4	12.26	303.8	5.69
LP-05-136	296.95	385.16	0.770978	0.05169	0.0017	0.33379	0.00697	0.04687	0.00078	271.8	73.42	292.5	5.3	295.3	4.83
LP-05-137	279.2	311.29	0.896913	0.05681	0.00205	0.38091	0.0097	0.04867	0.00084	483.6	78.35	327.7	7.14	306.3	5.14
LP-05-138	183.82	290.89	0.631923	0.0801	0.0026	2.11602	0.04297	0.19174	0.00325	1199.5	62.58	1154	14	1130.8	17.61
LP-05-139	197.33	246.23	0.801405	0.05626	0.00272	0.37979	0.01538	0.049	0.00092	461.7	104.4	326.9	11.32	308.4	5.66
LP-05-140	239	331.04	0.721967	0.05508	0.00196	0.34444	0.00853	0.04538	0.00077	415.5	77.04	300.5	6.44	286.1	4.78
LP-05-141	190.14	519.43	0.366055	0.05772	0.00185	0.55486	0.01093	0.06976	0.00116	519	69.12	448.2	7.14	434.7	7.01
LP-05-142	56.06	54.45	1.02957	0.09454	0.00321	3.47844	0.07876	0.26701	0.00469	1518.9	62.62	1522.3	17.86	1525.6	23.87
LP-05-143	129.62	190.26	0.681278	0.06117	0.00213	0.56059	0.01337	0.06651	0.00113	645.2	73.27	451.9	8.7	415.1	6.86
LP-05-144	321.28	356.19	0.901991	0.05436	0.00188	0.34363	0.008	0.04587	0.00078	386.1	75	299.9	6.04	289.1	4.78
LP-06
LP-06-01	62.3267	64.9598	0.959467	0.0586359	0.00355401	0.61376	0.0360076	0.077009	0.00128391	553.74	131.462	485.929	22.6599	478.245	7.6848
LP-06-02	337.27	372.205	0.906142	0.0593	0.00162463	0.686881	0.0180543	0.0839466	0.000736625	588.915	59.2475	530.925	10.8678	519.636	4.38084
LP-06-03	50.6094	164.197	0.308224	0.15406	0.00269018	9.39962	0.164768	0.440673	0.00335167	2391.66	29.63	2377.79	16.0887	2353.65	14.9974
LP-06-04	163.145	202.152	0.80704	0.0553479	0.00214742	0.503365	0.01932	0.0658683	0.000672848	433.38	82.4	413.978	13.0496	411.215	4.06941
LP-06-05	137.653	219.607	0.626814	0.0558619	0.00174729	0.538594	0.0161526	0.0700624	0.000854232	455.6	73.14	437.497	10.6601	436.532	5.14618
LP-06-06	118.326	128.452	0.921174	0.0552924	0.00271103	0.576701	0.0287415	0.075323	0.00103087	433.38	111.1	462.339	18.5114	468.146	6.17991
LP-06-07	466.746	350.92	1.33006	0.0610748	0.00295803	0.564275	0.0238655	0.0672599	0.00081176	642.61	71.2875	454.305	15.4925	419.626	4.90316
LP-06-08	101.933	132.79	0.767625	0.0571289	0.00252836	0.599436	0.0251483	0.0765308	0.000875337	498.19	98.1375	476.876	15.9664	475.382	5.24164
LP-06-09	107.582	170.216	0.632034	0.0574841	0.00207475	0.596398	0.0230245	0.0746167	0.000845403	509.3	79.62	474.945	14.6457	463.91	5.07141
LP-06-10	139.605	116.273	1.20067	0.170883	0.00331827	11.4301	0.222305	0.483498	0.00454339	2566.35	77	2558.88	18.1615	2542.48	19.743
LP-06-11	172.354	178.176	0.967324	0.0581029	0.00223634	0.570166	0.0213987	0.0712186	0.000702454	600.025	80.5425	458.122	13.8388	443.493	4.22725
LP-06-12	189.643	327.658	0.578784	0.0585237	0.00179134	0.562247	0.0168895	0.0695768	0.000698273	550.035	68.5075	452.988	10.9778	433.605	4.20854
LP-06-13	81.8923	158.28	0.517389	0.0559557	0.00241121	0.535342	0.0233027	0.0692063	0.000824174	450.045	94.435	435.349	15.4122	431.372	4.96908
LP-06-14	214.647	285.976	0.750579	0.0774879	0.00171176	1.9617	0.041955	0.183448	0.00174994	1144.45	38.4275	1102.47	14.3847	1085.78	9.53221
LP-06-15	596.75	584.351	1.02122	0.0685434	0.00201798	0.442551	0.0126964	0.0473314	0.000907145	884.87	56.48	372.049	8.93699	298.117	5.58356
LP-06-16	201.982	457.382	0.441605	0.0659199	0.00218652	0.347924	0.0110727	0.0384098	0.000401762	805.555	70.3625	303.159	8.3412	242.968	2.49412
LP-06-17	75.4226	397.139	0.189915	0.0729941	0.00140705	1.6855	0.0315072	0.167395	0.00157429	1012.96	38.89	1003.06	11.9134	997.744	8.6933
LP-06-18	526.101	797.004	0.660098	0.0730978	0.00159735	0.822051	0.0185827	0.0815626	0.000999235	1016.66	44.445	609.192	10.356	505.443	5.95572
LP-06-19	351.452	358.51	0.980311	0.0559033	0.00145871	0.585978	0.0151568	0.0760165	0.000778807	450.045	57.4025	468.296	9.70406	472.302	4.66583
LP-06-20	223.928	172.277	1.29981	0.0797471	0.00295428	0.823649	0.030068	0.0751802	0.000924036	1190.74	72.6825	610.082	16.743	467.289	5.54021
LP-06-21	285.323	370.184	0.770759	0.0586497	0.0015587	0.561665	0.0145135	0.0694422	0.000675456	553.74	58.1675	452.609	9.43687	432.794	4.07153
LP-06-22	205.177	347.993	0.589602	0.0539991	0.00151342	0.508786	0.0140193	0.0681932	0.000649033	372.275	62.9575	417.632	9.435	425.261	3.91683
LP-06-23	167.302	246.001	0.680088	0.163493	0.00296216	10.4032	0.187398	0.459849	0.00382167	2492.28	31.33	2471.33	16.6882	2438.89	16.8758
LP-06-24	52.5861	58.8391	0.893728	0.0624032	0.00318259	0.909895	0.0461035	0.105961	0.00151721	687.05	109.242	657.002	24.5154	649.247	8.84348
LP-06-25	593.348	397.144	1.49404	0.054053	0.00179621	0.454915	0.0142077	0.061097	0.000664578	372.275	78.695	380.715	9.91584	382.294	4.03747
LP-06-26	409.671	444.485	0.921677	0.0557788	0.00141515	0.563756	0.0145074	0.073041	0.000736817	442.64	55.55	453.968	9.42029	454.451	4.42651
LP-06-27	197.049	261.449	0.753678	0.0528913	0.00174263	0.481462	0.0151509	0.0661049	0.000691967	324.13	71.29	399.075	10.3847	412.646	4.18412
LP-06-28	51.466	76.2072	0.675342	0.0616619	0.00288169	0.837741	0.0381365	0.0991012	0.00140576	661.125	97.2075	617.898	21.0741	609.139	8.245
LP-06-29	281.818	399.902	0.704718	0.117291	0.00236238	2.92812	0.0731806	0.180912	0.00353515	1916.66	35.65	1389.21	18.9187	1071.96	19.2979
LP-06-30	127.511	82.2422	1.55043	0.0690756	0.00298131	1.42569	0.0595567	0.149618	0.00172928	901.85	88.89	899.748	24.9352	898.822	9.69682
LP-06-31	144.866	116.432	1.24422	0.0565924	0.00280649	0.602627	0.0286555	0.0777215	0.000997498	475.97	111.098	478.9	18.1573	482.508	5.96656
LP-06-32	78.554	387.712	0.202609	0.0711488	0.00149775	1.58585	0.0324494	0.161484	0.00146086	961.11	43.6725	964.671	12.7425	965.017	8.10802
LP-06-33	224.339	231.232	0.970188	0.0560161	0.00185699	0.566305	0.0195973	0.0730681	0.000798869	453.75	74.065	455.622	12.705	454.614	4.79918
LP-06-34	54.3227	250.683	0.216698	0.0730049	0.00171669	1.60159	0.0388882	0.15863	0.00126018	1013.88	48.1525	970.832	15.1789	949.161	7.0114
LP-06-35	91.338	133.555	0.683897	0.0564175	0.00269437	0.539428	0.0254737	0.0695877	0.000844983	477.82	102.767	438.047	16.8036	433.671	5.09272
LP-06-36	168.984	801.64	0.210798	0.075863	0.00194709	1.42559	0.0408318	0.135861	0.00139722	1100	51.8525	899.706	17.0943	821.215	7.92975
LP-06-37	194.487	274.094	0.709564	0.0582508	0.00185851	0.619189	0.0198145	0.0770761	0.000723185	538.925	65.73	489.339	12.4262	478.647	4.32834
LP-06-38	145.542	143.501	1.01422	0.10481	0.00249547	4.15292	0.0986903	0.286988	0.00218247	1710.8	43.83	1664.78	19.4493	1626.46	10.9318
LP-06-39	281.208	332.86	0.844823	0.059594	0.00177191	0.58896	0.0181865	0.0714397	0.000701789	588.61	64.805	470.203	11.6221	444.823	4.22238
LP-06-40	117.533	108.553	1.08273	0.0701135	0.00280689	1.04952	0.040887	0.109312	0.00142752	931.48	78.705	728.643	20.2592	668.752	8.29557
LP-06-41	251.518	223.248	1.12663	0.0573878	0.00199253	0.614364	0.0230898	0.0776151	0.00120431	505.595	80.545	486.309	14.5237	481.872	7.2043
LP-06-42	138.851	233.382	0.594952	0.0769022	0.00250163	0.77975	0.0268943	0.0732642	0.00093166	1120.37	64.8125	585.341	15.3449	455.791	5.59589
LP-06-43	319.81	402.596	0.79437	0.0599225	0.00180232	0.486373	0.0143058	0.0589778	0.000696583	611.13	32.4025	402.436	9.77298	369.406	4.24038
LP-06-44	64.9725	131.069	0.495711	0.0753373	0.00210655	1.92042	0.0521698	0.18513	0.00190931	1077.47	56.0225	1088.21	18.1405	1094.94	10.3856
LP-06-45	244.143	363.707	0.671262	0.0589488	0.00175533	0.536457	0.0160451	0.0659568	0.000617903	564.85	64.8025	436.086	10.6039	411.751	3.73679
LP-06-46	262.837	344.478	0.763001	0.0886943	0.00178234	2.93281	0.0617352	0.24001	0.0028648	1398.15	38.585	1390.42	15.9403	1386.75	14.8932
LP-06-47	151.757	336.304	0.451249	0.110239	0.00221467	4.28643	0.0938627	0.281542	0.00282772	1803.39	36.425	1690.76	18.0304	1599.12	14.224
LP-06-48	199.366	288.193	0.691778	0.0579117	0.00199935	0.492112	0.0171167	0.0617203	0.000665275	527.815	80.5425	406.349	11.6484	386.079	4.03933
LP-06-49	91.4388	223.057	0.409935	0.106591	0.002297	4.57202	0.102592	0.311148	0.0031018	1742.59	39.505	1744.18	18.6974	1746.35	15.2504
LP-06-50	496.439	526.089	0.943641	0.0518261	0.00142852	0.488126	0.0138258	0.0682226	0.000642602	275.99	62.955	403.633	9.43396	425.438	3.87792
LP-06-51	88.9646	123.835	0.718412	0.102976	0.00245357	4.17997	0.103891	0.293801	0.00298782	1679.63	43.365	1670.1	20.3676	1660.5	14.887
LP-06-52	236.21	365.912	0.645537	0.0543112	0.00182044	0.417222	0.0134	0.0562373	0.00081833	383.385	75.9175	354.063	9.60085	352.702	4.99442
LP-06-53	156.732	150.752	1.03967	0.0551257	0.00241743	0.594954	0.0270888	0.077895	0.000954764	416.715	102.767	474.027	17.247	483.546	5.71002
LP-06-54	256.791	265.163	0.968425	0.0600194	0.00192785	0.546437	0.0174546	0.066059	0.000788739	605.575	70.3575	442.66	11.4611	412.368	4.76947
LP-06-55	41.1638	110.293	0.373223	0.0713051	0.00261545	1.58025	0.0622931	0.15981	0.00209598	966.35	69.4475	962.468	24.5184	955.723	11.6498
LP-06-56	240.217	225.69	1.06436	0.220119	0.00410392	18.1773	0.409101	0.595452	0.00701158	2983.34	31.02	2999.16	21.664	3011.49	28.3304
LP-06-57	29.5408	56.3034	0.524673	0.101216	0.00302483	4.1419	0.123274	0.296431	0.00342096	1646.6	55.555	1662.61	24.3478	1673.59	17.0105
LP-06-58	239.403	365.831	0.654411	0.0575409	0.00183367	0.587061	0.0183958	0.0739721	0.000850065	522.26	74.99	468.989	11.7699	460.042	5.10243
LP-06-59	126.236	203.077	0.621615	0.0826178	0.0024293	2.2867	0.065567	0.200333	0.00221356	1261.11	25	1208.19	20.2588	1177.11	11.888
LP-06-60	288.503	271.023	1.0645	0.0578993	0.00220436	0.562904	0.0204551	0.0705988	0.000834672	524.11	83.32	453.415	13.2899	439.762	5.02582
LP-06-61	198.206	244.161	0.811783	0.0642975	0.00198957	1.1727	0.0345234	0.132158	0.00148839	750.005	66.66	787.906	16.1354	800.164	8.47478
LP-06-62	190.492	201.856	0.943701	0.0595111	0.00208833	0.626741	0.021404	0.0764667	0.000887735	587.065	75.9125	494.064	13.3608	474.998	5.3162
LP-06-63	206.035	145.035	1.42059	0.057839	0.00241039	0.591826	0.024265	0.0745104	0.001042	524.11	92.5775	472.033	15.4792	463.272	6.25138
LP-06-64	161.337	235.015	0.686496	0.054805	0.00195788	0.581891	0.0208793	0.0766954	0.000817772	405.605	81.4725	465.676	13.4027	476.367	4.89618
LP-06-65	545.739	769.402	0.709303	0.0851683	0.00239483	0.519175	0.0188056	0.0442179	0.00116012	1320.37	54.17	424.6	12.5699	278.925	7.1619
LP-06-66	99.4216	152.668	0.651226	0.0973624	0.014692	0.554163	0.114087	0.0362001	0.000873428	1575.93	285.962	447.72	74.671	229.236	5.43377
LP-06-67	245.138	392.84	0.624014	0.0602789	0.00207995	0.472015	0.0163165	0.0568251	0.000566843	612.98	74.0625	392.58	11.2555	356.288	3.45762
LP-06-68	136.353	416.697	0.327223	0.0686152	0.00177589	1.50461	0.0378271	0.158974	0.0013781	887.035	52.9325	932.258	15.3365	951.072	7.66522
LP-06-69	166.093	332.463	0.499583	0.181036	0.00307043	10.1261	0.178369	0.404697	0.00372659	2662.66	27.62	2446.35	16.2797	2190.63	17.102
LP-06-70	548.02	1023.54	0.535415	0.102212	0.00221712	0.917434	0.0212367	0.0649928	0.000795674	1664.81	36.1125	661.002	11.2464	405.918	4.81623
LP-06-71	330.281	625.584	0.527956	0.0555596	0.00147161	0.501523	0.0124711	0.065508	0.000652151	435.23	62.03	412.733	8.43361	409.036	3.94557
LP-06-72	185.514	283.19	0.655087	0.0657816	0.00243276	0.605577	0.0262504	0.0670418	0.00176435	798.15	77.7725	480.767	16.6025	418.309	10.6591
LP-06-73	191.833	224.374	0.854966	0.0757183	0.00210378	1.41629	0.0384531	0.13533	0.00125356	1087.04	55.5575	895.806	16.1603	818.2	7.11771
LP-06-74	155.679	104.893	1.48417	0.0551532	0.00264178	0.509878	0.0234737	0.0672627	0.000977373	416.715	105.545	418.367	15.7872	419.643	5.90347
LP-06-75	52.4977	49.8031	1.05411	0.0765333	0.00318844	1.98848	0.0849988	0.188098	0.00249589	1109.26	78.7025	1111.61	28.8874	1111.07	13.5423
LP-06-76	85.5341	172.004	0.49728	0.0677027	0.00183338	1.33073	0.0370241	0.142027	0.00161719	861.105	142.75	859.2	16.1309	856.115	9.12857
LP-06-77	161.399	164.601	0.980543	0.242492	0.00482602	20.4897	0.416802	0.609519	0.00579481	3136.11	31.4825	3114.76	19.6962	3068.08	23.2093
LP-06-78	171.711	328.529	0.522667	0.0656225	0.00192859	1.24028	0.0338291	0.137028	0.00150389	794.445	61.105	819.007	15.3339	827.833	8.52633
LP-07
LP-07-01	229.689	393.367	0.583905	0.0573681	0.00165151	0.547667	0.0158765	0.0688299	0.000817327	505.595	62.955	443.467	10.4165	429.103	4.92953
LP-07-02	92.9418	144.365	0.643798	0.0551472	0.00216228	0.521523	0.0206904	0.0680867	0.000793166	416.715	87.0275	426.168	13.8085	424.619	4.78714
LP-07-03	51.6077	219.683	0.234919	0.0701073	0.00173074	1.50961	0.0359151	0.155293	0.00147687	931.48	50.77	934.282	14.5322	930.565	8.24076
LP-07-04	161.872	311.606	0.519477	0.12557	0.00227311	6.43122	0.11196	0.368277	0.00312455	2036.72	31.6325	2036.54	15.2991	2021.29	14.7208
LP-07-05	165.124	252.21	0.654709	0.0667767	0.00184356	1.21436	0.0308	0.131221	0.00127332	831.48	57.405	807.193	14.1241	794.826	7.25617
LP-07-06	157.521	277.714	0.567207	0.151128	0.00316065	9.22144	0.188576	0.43895	0.00516392	2358.95	35.03	2360.24	18.735	2345.94	23.1342
LP-07-07	240.642	210.228	1.14467	0.0575955	0.00188299	0.668686	0.020709	0.0837823	0.000882684	522.26	70.36	519.913	12.6019	518.659	5.25027
LP-07-08	121.211	212.38	0.570729	0.0717957	0.00187766	1.63569	0.0412958	0.163904	0.00149775	988.89	52.3175	984.053	15.9102	978.435	8.29546
LP-07-09	111.155	249.604	0.445326	0.138018	0.00264597	7.28575	0.170641	0.377721	0.00484008	2202.78	33.3375	2147.07	20.9142	2065.63	22.647
LP-07-10	150.511	88.1955	1.70656	0.150748	0.00313569	9.09261	0.184821	0.434151	0.00423623	2354.64	36.265	2347.37	18.5962	2324.4	19.0416
LP-07-11	528.973	349.475	1.51362	0.0552791	0.00164243	0.556107	0.0164743	0.072397	0.00075596	433.38	60.18	448.989	10.7501	450.581	4.54424
LP-07-12	217.797	178.477	1.22031	0.0793239	0.00213656	2.2243	0.0563927	0.202047	0.00194071	1188.89	52.31	1188.72	17.7608	1186.31	10.4078
LP-07-13	61.2242	127.553	0.479989	0.148344	0.00307588	8.82958	0.179358	0.428934	0.00419078	2327.78	35.495	2320.55	18.5296	2300.91	18.9061
LP-07-14	80.1222	341.896	0.234347	0.146918	0.00260332	8.92131	0.186041	0.43667	0.00516773	2310.18	30.56	2329.98	19.0424	2335.72	23.188
LP-07-15	48.9085	90.1853	0.542311	0.0678512	0.00268421	1.25268	0.0470009	0.13411	0.00153059	864.81	77.62	824.612	21.1885	811.271	8.70004
LP-07-16	106.516	244.945	0.434856	0.168459	0.00275145	11.2075	0.180633	0.480212	0.00390239	2542.28	27.47	2540.54	15.0255	2528.19	16.9952
LP-07-17	80.6181	120.752	0.667636	0.196674	0.00354629	14.7677	0.263255	0.542524	0.00464142	2799.07	29.6275	2800.39	16.9543	2794	19.3972
LP-07-18	92.7433	116.582	0.795523	0.0576142	0.00298398	0.599071	0.0302837	0.0753758	0.000927524	516.705	117.575	476.644	19.2319	468.462	5.56011
LP-07-19	48.8098	63.2255	0.771995	0.0897127	0.00353938	2.29344	0.0822147	0.18711	0.00222827	1420.37	75.9275	1210.27	25.3525	1105.7	12.1003
LP-07-20	180.79	281.201	0.642919	0.0581845	0.00180596	0.555686	0.017415	0.0692746	0.000741373	600.025	66.655	448.715	11.3671	431.784	4.46957
LP-07-21	92.0881	87.5192	1.0522	0.0923192	0.00342714	1.68483	0.0607872	0.133147	0.00162834	1473.77	65.9	1002.81	22.9932	805.793	9.26357
LP-07-22	412.224	319.106	1.29181	0.055005	0.00202679	0.45771	0.0159476	0.060595	0.000634733	413.01	86.1025	382.664	11.1089	379.243	3.85798
LP-07-23	353.934	338.507	1.04557	0.0575087	0.0016465	0.590376	0.0171834	0.0741676	0.000630676	509.3	58.3275	471.108	10.9713	461.215	3.78488
LP-07-24	177.983	163.346	1.08961	0.089849	0.00233697	2.99604	0.0781639	0.241371	0.00237238	1433.34	50	1406.62	19.8638	1393.82	12.3197
LP-07-25	181.783	257.644	0.70556	0.0556421	0.00190274	0.504211	0.0167636	0.0658843	0.000656639	438.935	80.5475	414.549	11.3163	411.312	3.97132
LP-07-26	74.4286	85.7743	0.867727	0.101771	0.00263186	4.02091	0.103151	0.286486	0.00286581	1657.4	48.1475	1638.43	20.8632	1623.95	14.3602
LP-07-27	57.4229	105.303	0.54531	0.10965	0.00240186	4.81722	0.10568	0.318975	0.00353459	1794.44	39.665	1787.91	18.4483	1784.72	17.2752
LP-07-28	120.902	189.77	0.637098	0.155768	0.0026805	9.8492	0.189757	0.45768	0.00464117	2410.18	29.32	2420.77	17.7613	2429.31	20.5251
LP-07-29	99.5922	232.766	0.427864	0.0983449	0.0018793	3.88074	0.0795215	0.285938	0.00281593	1594.44	30.7075	1609.68	16.545	1621.2	14.1163
LP-07-30	126.868	139.285	0.910849	0.0718561	0.00242215	1.73788	0.0580968	0.175983	0.00197352	983.335	63.8925	1022.68	21.5493	1044.99	10.8183
LP-07-31	133.016	278.56	0.477512	0.0744669	0.00162593	1.86506	0.0422836	0.181694	0.00203301	1053.71	44.445	1068.78	14.9865	1076.22	11.0906
LP-07-32	141.037	262.494	0.537298	0.0804483	0.00157879	2.29165	0.0471683	0.206332	0.00209828	1209.26	43.515	1209.72	14.5511	1209.25	11.2128
LP-07-33	201.927	251.193	0.803871	0.0969037	0.00194768	3.64977	0.0725901	0.272929	0.00249923	1565.13	37.495	1560.46	15.853	1555.65	12.6567
LP-07-34	132.402	281.974	0.469554	0.0701334	0.00165179	1.51551	0.0357592	0.156461	0.00153071	931.48	52.78	936.668	14.4351	937.078	8.5326
LP-07-35	140.666	282.53	0.497881	0.114547	0.00221533	5.34111	0.103662	0.337037	0.00290668	1872.53	34.105	1875.47	16.6005	1872.4	14.0143
LP-07-36	143.335	244.165	0.587039	0.159474	0.0033094	10.1004	0.202752	0.457693	0.00359669	2450.3	35.185	2444.01	18.5483	2429.36	15.9058
LP-07-37	119.77	423.471	0.28283	0.138711	0.00263407	7.73728	0.168017	0.402947	0.00501913	2212.96	27.315	2200.94	19.5281	2182.6	23.0625
LP-07-38	313.236	494.549	0.633378	0.055816	0.00158023	0.56787	0.0155521	0.0737513	0.000602275	455.6	58.3275	456.636	10.0721	458.716	3.61584
LP-07-39	92.84	187.525	0.495081	0.0669241	0.00213547	1.24535	0.0392313	0.134878	0.0013759	835.18	66.665	821.305	17.7428	815.636	7.8155
LP-07-40	137.105	184.865	0.741649	0.157229	0.00278548	9.95542	0.196742	0.457987	0.00471581	2427.78	30.705	2430.66	18.2366	2430.66	20.8508
LP-07-41	154.875	305.964	0.506187	0.0533179	0.0018415	0.506615	0.0168698	0.0693588	0.000800908	342.65	79.6225	416.17	11.3698	432.292	4.82811
LP-07-42	38.9592	116.955	0.333112	0.191397	0.00391854	13.9685	0.302678	0.528935	0.0055678	2754.02	33.64	2747.58	20.5348	2736.96	23.4755
LP-07-43	481.306	885.058	0.543814	0.0966457	0.00190676	1.88865	0.0372266	0.141722	0.00125766	1561.12	37.0375	1077.11	13.0862	854.395	7.101
LP-07-44	336.774	228.327	1.47497	0.0549343	0.0020128	0.511003	0.0179937	0.0678376	0.000821755	409.31	87.955	419.123	12.0922	423.115	4.96084
LP-07-45	106.305	267.321	0.397668	0.0763908	0.00175469	1.92369	0.0429646	0.182646	0.00138649	1105.56	45.5275	1089.35	14.9225	1081.41	7.55757
LP-07-46	320.499	371.815	0.861984	0.0635592	0.00226281	0.620524	0.0225694	0.0710299	0.000819974	727.785	274.993	490.175	14.1424	442.358	4.93534
LP-07-47	98.1377	203.758	0.481637	0.0708351	0.00208441	1.53491	0.0450519	0.157091	0.00146626	953.7	56.48	944.468	18.0479	940.591	8.16885
LP-07-48	223.478	242.104	0.923066	0.0718782	0.00271069	0.66671	0.0258883	0.0669925	0.000806251	983.335	75.9275	518.71	15.7728	418.011	4.8711
LP-07-49	65.5743	366.132	0.1791	0.0709665	0.00180231	1.53558	0.0381619	0.156708	0.00127207	966.665	52.935	944.737	15.2832	938.455	7.08934
LP-07-50	273.209	224.234	1.21841	0.0663467	0.00195202	1.1969	0.0352997	0.130797	0.00132147	816.665	61.88	799.153	16.3166	792.408	7.5334
LP-07-51	279.32	236.406	1.18152	0.0562085	0.00197233	0.562488	0.0192079	0.0727105	0.000735362	461.155	105.543	453.145	12.4829	452.465	4.41913
LP-07-52	542.429	394.998	1.37325	0.0695063	0.00173075	0.653212	0.015779	0.0680615	0.000696481	922.22	51.8525	510.454	9.69156	424.467	4.2037
LP-07-53	259.5	290.507	0.893265	0.154752	0.00256006	9.56292	0.159061	0.446596	0.00423903	2399.07	27.775	2393.61	15.2912	2380.1	18.8903
LP-07-54	199.536	201.986	0.987869	0.066589	0.00184293	1.29493	0.0345156	0.140869	0.00134634	833.33	59.255	843.48	15.2725	849.577	7.60742
LP-07-55	100.234	161.013	0.622519	0.0583113	0.00252108	0.587711	0.0249037	0.073215	0.000857891	542.63	95.2	469.405	15.9279	455.496	5.15304
LP-07-56	124.445	106.958	1.1635	0.160695	0.00301938	10.298	0.196793	0.462735	0.0038132	2464.81	31.485	2461.93	17.6881	2451.62	16.8052
LP-07-57	52.1086	85.675	0.608212	0.152544	0.00325105	9.39865	0.204835	0.445133	0.00394325	2375.93	35.9525	2377.7	20.0039	2373.58	17.59
LP-07-58	114.226	398.04	0.286971	0.0552966	0.00179306	0.502475	0.0160578	0.0658592	0.000722954	433.38	72.215	413.377	10.8524	411.16	4.37249
LP-07-59	166.6	201.041	0.828688	0.0583935	0.00235283	0.571195	0.022905	0.0708877	0.00073815	546.33	88.875	458.787	14.8034	441.501	4.44344
LP-07-60	197.063	224.528	0.877677	0.0552108	0.00213679	0.506059	0.0190405	0.0664769	0.000711308	420.42	87.0275	415.796	12.8378	414.895	4.29957
LP-07-61	30.4405	59.6718	0.510132	0.167179	0.00392507	10.9908	0.247986	0.476784	0.00496426	2529.32	34.105	2522.35	21.0026	2513.24	21.6699
LP-07-62	259.445	330.739	0.784441	0.0658822	0.00162258	1.10233	0.0261494	0.121342	0.0012368	1200	51.8475	754.475	12.6303	738.284	7.11017
LP-07-63	178.733	190.462	0.938417	0.0728609	0.00199776	1.69169	0.045101	0.168101	0.0014007	1009.26	55.56	1005.4	17.015	1001.64	7.73008
LP-07-64	95.8627	67.5348	1.41946	0.186805	0.00394662	13.3943	0.280833	0.519761	0.00542277	2714.51	35.65	2707.86	19.8126	2698.17	23.002
LP-07-65	76.0425	109.326	0.695555	0.0698681	0.0021884	1.50438	0.046637	0.156152	0.00154725	924.07	64.05	932.162	18.9108	935.358	8.62709
LP-07-66	32.6905	85.6807	0.381538	0.258474	0.00583796	21.7161	0.503296	0.607637	0.00553874	3238.89	35.4925	3171.12	22.5004	3060.53	22.2097
LP-07-67	30.4848	55.5487	0.548795	0.0709482	0.00316285	1.53613	0.0651811	0.158508	0.00213985	966.665	97.2275	944.956	26.1021	948.48	11.907
LP-07-68	436.095	263.116	1.65742	0.0549343	0.00215103	0.482381	0.0187072	0.0637584	0.000753459	409.31	87.0275	399.705	12.8145	398.442	4.56599
LP-07-69	64.3757	169.435	0.379943	0.0702231	0.00185262	1.4706	0.0386789	0.151679	0.00162115	1000	54.1675	918.376	15.8978	910.37	9.07422
LP-07-70	104.283	161.573	0.645424	0.0662225	0.00201894	1.23533	0.0342161	0.135815	0.00135085	812.96	62.96	816.761	15.5437	820.956	7.66684
LP-07-71	22.1386	57.4955	0.385049	0.186144	0.00432185	13.3233	0.295959	0.518537	0.005391	2708.34	38.2725	2702.84	20.9836	2692.97	22.8857
LP-07-72	41.1247	262.645	0.156579	0.0719869	0.00193766	1.53948	0.0403037	0.154725	0.00154626	987.04	53.7075	946.295	16.1163	927.394	8.63221
LP-07-73	133.027	324.269	0.410237	0.0743022	0.00183946	1.60353	0.0397288	0.155865	0.00133173	1050.01	50	971.586	15.4956	933.755	7.42722
LP-07-74	156.622	303.887	0.515397	0.0645398	0.00235462	0.556526	0.0211826	0.0624667	0.000942162	761.115	77.77	449.262	13.8191	390.609	5.71648
LP-07-75	135.954	210.722	0.645181	0.0559874	0.00205483	0.556559	0.0200247	0.0720203	0.000779295	450.045	81.475	449.284	13.0633	448.316	4.68616
LP-07-76	92.6897	207.682	0.446306	0.238137	0.00412595	18.8613	0.33048	0.572006	0.00422497	3109.26	27.47	3034.75	16.8969	2916.05	17.3256
LP-07-77	71.1227	80.6579	0.881782	0.0732711	0.00315178	1.31411	0.0565113	0.13044	0.0014932	1021.29	87.0375	851.93	24.8009	790.377	8.51508
LP-07-78	78.1428	103.664	0.753809	0.101379	0.00274616	4.06139	0.114116	0.28963	0.00312976	1649.99	50.3075	1646.59	22.897	1639.68	15.6446
LP-08
LP-08-01	162.489	221.66	0.733053	0.0508765	0.00290413	0.331169	0.0180846	0.0477668	0.000812208	235.25	131.462	290.458	13.7954	300.797	4.99714
LP-08-02	125.548	334.608	0.375208	0.0540534	0.00221654	0.520635	0.0213837	0.069411	0.000878269	372.275	92.585	425.575	14.2796	432.606	5.29421
LP-08-03	220.693	346.815	0.636343	0.0583306	0.00452608	0.409315	0.0353846	0.0499629	0.000972257	542.63	170.348	348.382	25.4993	314.294	5.96933
LP-08-04	156.698	218.625	0.716745	0.054618	0.00338574	0.359569	0.0217132	0.0476801	0.00070431	398.2	140.727	311.893	16.2177	300.263	4.33365
LP-08-05	165.76	200.782	0.825576	0.0542098	0.00306824	0.360448	0.0205583	0.0480298	0.000684559	388.94	123.135	312.549	15.345	302.414	4.21071
LP-08-06	133.942	182.242	0.734969	0.0509263	0.00353453	0.349036	0.0242744	0.049586	0.000850943	238.955	156.46	303.996	18.2726	311.979	5.22638
LP-08-07	71.0293	154.933	0.458452	0.0871772	0.0028999	2.97384	0.10261	0.246295	0.00367181	1364.81	64.35	1400.96	26.2245	1419.34	18.9924
LP-08-08	249.923	615.032	0.406358	0.116565	0.00284985	5.33792	0.131507	0.329574	0.00313821	1905.56	43.055	1874.96	21.0714	1836.32	15.2156
LP-08-09	76.2336	167.01	0.456461	0.0531382	0.00328988	0.356776	0.0217562	0.0484799	0.000850968	344.5	145.35	309.805	16.2833	305.182	5.23205
LP-08-10	174.13	216.119	0.805715	0.0552523	0.00306514	0.535917	0.0298208	0.0703649	0.00103325	433.38	124.062	435.729	19.7168	438.353	6.22289
LP-08-11	216.894	301.867	0.718506	0.054237	0.00257083	0.530679	0.0239301	0.0710037	0.00092588	388.94	74.9925	432.26	15.8755	442.2	5.57291
LP-08-12	273.655	368.226	0.743172	0.0524432	0.00252185	0.343506	0.0160281	0.0474828	0.000615198	305.615	109.245	299.825	12.1141	299.049	3.78605
LP-08-13	115.053	215.837	0.533054	0.0558066	0.0030839	0.533754	0.0275632	0.0701923	0.00115284	455.6	124.062	434.298	18.2495	437.314	6.94423
LP-08-14	140.209	210.063	0.66746	0.0620411	0.0052168	0.628431	0.0496751	0.0760532	0.00176943	675.94	186.087	495.118	30.9837	472.521	10.6003
LP-08-15	100.203	171.323	0.584878	0.0533436	0.00345637	0.34807	0.0212628	0.0477457	0.00067919	342.65	146.278	303.268	16.0167	300.667	4.17882
LP-08-16	253.859	286.242	0.886871	0.0515783	0.00233395	0.423435	0.0185147	0.0596173	0.000775962	333.39	100.91	358.505	13.2079	373.298	4.72074
LP-08-17	159.42	238.631	0.66806	0.106225	0.0446613	0.551637	0.11906	0.0537312	0.00265355	1735.49	854.625	446.069	78.0654	337.389	16.2337
LP-08-18	258.147	335.053	0.770468	0.0559419	0.00278239	0.433992	0.022145	0.0558436	0.000696307	450.045	111.1	366.007	15.6817	350.298	4.25128
LP-08-19	87.257	294.771	0.296016	0.0567856	0.00314773	0.578754	0.0376371	0.0737161	0.00153457	483.375	122.205	463.66	24.2111	458.505	9.21328
LP-08-20	157.005	308.678	0.508635	0.0744629	0.00297841	0.869116	0.0349532	0.0843906	0.00112041	1053.71	80.095	635.087	18.9903	522.277	6.66055
LP-08-21	174.481	366.696	0.47582	0.0549663	0.00282194	0.383883	0.0194358	0.0508755	0.000740883	409.31	110.175	329.891	14.2614	319.894	4.54482
LP-08-22	89.8772	123.635	0.726958	0.0999023	0.00317256	3.9335	0.129237	0.283875	0.00365542	1633.33	58.95	1620.6	26.6048	1610.85	18.3541
LP-08-23	110.342	492.673	0.223965	0.0520369	0.00212056	0.360314	0.0144386	0.0501137	0.000601281	287.1	92.58	312.449	10.7778	315.22	3.69113
LP-08-24	160.714	301.15	0.533667	0.0691944	0.00908745	0.676375	0.0609531	0.0766234	0.00161022	905.555	273.295	524.581	36.9356	475.937	9.64137
LP-08-25	46.6275	273.46	0.170509	0.0799852	0.00246077	2.44044	0.0741109	0.220353	0.00216856	1198.15	56.475	1254.61	21.8759	1283.74	11.4553
LP-08-26	57.0514	273.146	0.208868	0.0581728	0.00260762	0.570473	0.0254793	0.0712467	0.00102675	600.025	98.135	458.321	16.475	443.662	6.17868
LP-08-27	115.186	134.558	0.856033	0.157178	0.00370917	9.8681	0.236516	0.45392	0.0046252	2425.61	40.12	2422.53	22.1006	2412.66	20.5073
LP-08-28	178.182	367.108	0.485366	0.0553666	0.00225338	0.550776	0.0213335	0.0722772	0.000752991	427.825	86.1025	445.505	13.9692	449.861	4.5269
LP-08-29	294.573	456.983	0.644605	0.0574256	0.00227796	0.602442	0.0227023	0.0763043	0.000818118	509.3	88.8775	478.782	14.3862	474.025	4.90003
LP-08-30	138.632	231.246	0.599501	0.0550054	0.00291598	0.548286	0.029891	0.0722981	0.000970612	413.01	113.878	443.873	19.6053	449.986	5.8351
LP-08-31	12.4092	22.0334	0.563198	0.108925	0.00632102	5.29913	0.30979	0.359233	0.00781852	1783.34	105.715	1868.72	49.9766	1978.54	37.0812
LP-08-32	211.83	480.365	0.440978	0.0583191	0.00286236	0.416862	0.0190126	0.0524214	0.000710464	542.63	112.02	353.805	13.6261	329.371	4.35182
LP-08-33	26.4611	536.815	0.0492928	0.0577519	0.00200834	0.58199	0.0198412	0.0729198	0.000790113	520.41	75.915	465.74	12.7356	453.723	4.74723
LP-08-34	321.13	643.709	0.498874	0.0548413	0.0020341	0.374051	0.0133379	0.0494741	0.000566018	405.605	83.325	322.652	9.8566	311.292	3.47678
LP-08-35	182.453	308.457	0.5915	0.0558328	0.00258833	0.58436	0.0262509	0.075875	0.000904769	455.6	103.692	467.259	16.8252	471.454	5.42119
LP-08-36	93.083	251.377	0.370293	0.0579256	0.00300719	0.61533	0.0319333	0.0771635	0.00118354	527.815	112.945	486.916	20.0756	479.17	7.08302
LP-08-37	149.062	98.3516	1.5156	0.0726782	0.00314484	1.73218	0.0778786	0.171409	0.0022194	1005.56	92.75	1020.56	28.9505	1019.87	12.2137
LP-08-38	124.487	141.089	0.882331	0.0580608	0.00377433	0.392496	0.0254912	0.0487936	0.00101564	531.52	174.977	336.191	18.5898	307.111	6.24265
LP-08-39	94.9789	149.418	0.635658	0.14805	0.00353307	9.30943	0.221719	0.453749	0.00456237	2323.77	40.7425	2368.95	21.8406	2411.9	20.2311
LP-08-40	141.921	404.358	0.350979	0.0533949	0.00259643	0.374598	0.0174074	0.0508726	0.000631117	346.35	111.1	323.056	12.8591	319.877	3.87149
LP-08-41	106.399	139.091	0.764961	0.169588	0.00432792	11.3768	0.273381	0.48611	0.00649132	2553.39	42.9025	2554.53	22.4316	2553.82	28.1581
LP-08-42	52.9694	150.232	0.352585	0.0557018	0.00333858	0.538772	0.0308584	0.0705898	0.00122997	438.935	133.32	437.615	20.3651	439.708	7.4061
LP-08-43	110.354	479.356	0.230214	0.0531385	0.00209356	0.362751	0.0139874	0.0493203	0.00059863	344.5	88.88	314.267	10.4224	310.347	3.67763
LP-08-44	105.469	218.08	0.483624	0.0534918	0.00330007	0.375456	0.0225815	0.0511258	0.000845214	350.055	136.095	323.69	16.6715	321.43	5.18358
LP-08-45	225.061	554.353	0.405988	0.0604591	0.00197276	0.603945	0.0190393	0.072005	0.000821902	620.39	76.84	479.734	12.0535	448.224	4.94244
LP-08-46	80.1779	91.8429	0.872989	0.0603117	0.00434775	0.452278	0.0328925	0.0548137	0.00126073	614.52	157.387	378.873	23.0013	344.007	7.70484
LP-08-47	90.6183	138.992	0.651967	0.0517437	0.00376608	0.350545	0.0237001	0.0499862	0.000953938	272.285	166.645	305.131	17.8204	314.437	5.85673
LP-08-48	183.334	346.562	0.529008	0.0565096	0.00269702	0.544109	0.0249068	0.0693449	0.00102226	472.265	105.545	441.13	16.3797	432.208	6.16259
LP-08-49	131.205	143.954	0.911442	0.056277	0.00345271	0.410397	0.0260407	0.0529681	0.000934829	464.86	137.02	349.161	18.7495	332.718	5.72315
LP-08-50	352.949	776.896	0.454307	0.0531453	0.00199359	0.36655	0.0138135	0.0500517	0.000734057	344.5	80.5475	317.093	10.2641	314.839	4.50648
LP-08-51	101.939	198.841	0.512667	0.0727823	0.00239848	1.72461	0.0582065	0.171398	0.00243092	1009.26	67.1325	1017.75	21.6951	1019.81	13.3778
LP-08-52	113.246	251.988	0.449409	0.0550292	0.00249938	0.541681	0.0249791	0.0710789	0.00095348	413.01	106.47	439.532	16.4532	442.652	5.73863
LP-08-53	86.7715	402.678	0.215486	0.054544	0.00281086	0.362511	0.017623	0.0485199	0.000673895	394.495	116.655	314.087	13.1339	305.428	4.14318
LP-08-54	78.4267	200.03	0.392074	0.0567808	0.00298518	0.51781	0.0263429	0.0661639	0.000955403	483.375	116.653	423.688	17.6246	413.003	5.77671
LP-08-55	276.707	479.595	0.576961	0.0548695	0.00185999	0.541528	0.0195604	0.0707891	0.000888198	405.605	75.9175	439.431	12.8848	440.908	5.34717
LP-08-56	103.383	243.753	0.424129	0.0567228	0.00249274	0.554631	0.0236475	0.0708304	0.00099077	479.67	93.51	448.026	15.4462	441.157	5.96445
LP-08-57	134.374	190.914	0.703844	0.0501883	0.00344449	0.358129	0.0249124	0.0521317	0.000968311	211.185	165.72	310.817	18.6274	327.596	5.93285
LP-08-58	81.8792	1184.63	0.0691179	0.114756	0.00263724	5.33953	0.148907	0.334238	0.00610824	1876.24	40.89	1875.21	23.8543	1858.89	29.5124
LP-08-59	71.3156	115.215	0.618979	0.0520427	0.00345682	0.356378	0.0250608	0.0491046	0.00096593	287.1	151.832	309.507	18.7626	309.022	5.93534
LP-08-60	78.0168	193.046	0.404136	0.0521693	0.00305338	0.359977	0.0220791	0.0494138	0.00090924	300.06	133.315	312.197	16.4861	310.922	5.58534
LP-08-61	75.6059	79.7228	0.94836	0.104146	0.00308196	4.2878	0.136033	0.296582	0.00495269	1699.08	55.0925	1691.02	26.1273	1674.34	24.6242
LP-08-62	70.7142	193.5	0.365449	0.0555993	0.00343521	0.378877	0.020915	0.0503232	0.000837544	435.23	134.245	326.211	15.4027	316.505	5.14047
LP-08-63	55.7229	96.0498	0.580146	0.0950068	0.00876659	0.669025	0.0633607	0.0497072	0.000915358	1528.09	175.465	520.119	38.5653	312.724	5.62136
LP-08-64	154.592	224.551	0.688452	0.0558768	0.00327812	0.368901	0.0200012	0.048236	0.000716751	455.6	124.988	318.839	14.8369	303.682	4.40785
LP-08-65	62.0745	155.794	0.398438	0.0573288	0.00400426	0.377149	0.0258326	0.0480733	0.000833969	505.595	153.683	324.938	19.0488	302.682	5.12952
LP-08-66	251.71	341.37	0.737354	0.0521798	0.0025296	0.345837	0.0167315	0.0479758	0.000665192	300.06	138.87	301.585	12.6239	302.082	4.0918
LP-08-67	135.808	178.713	0.759926	0.0582681	0.00374773	0.388695	0.021554	0.0495876	0.000843986	538.925	142.575	333.416	15.7611	311.989	5.18364
LP-08-68	81.8777	179.2	0.456907	0.0580868	0.00294258	0.578509	0.0283171	0.0726893	0.00112903	531.52	111.095	463.503	18.217	452.338	6.785
LP-08-69	116.222	196.382	0.591815	0.0567906	0.00306875	0.368006	0.0200304	0.046516	0.000693588	483.375	115.725	318.175	14.8683	293.096	4.27242
LP-08-70	85.416	185.097	0.461467	0.052415	0.00348052	0.366482	0.0242375	0.0505841	0.000760807	301.91	154.61	317.043	18.0119	318.106	4.66833
LP-08-71	96.338	218.13	0.441654	0.0525182	0.00250675	0.488421	0.0230808	0.0672333	0.000928165	309.32	109.243	403.834	15.7467	419.466	5.6064
LP-08-72	43.3983	80.0226	0.542326	0.155271	0.00547099	9.80244	0.33587	0.455476	0.00606238	2404.63	60.6425	2416.38	31.5805	2419.55	26.8509
