# Supplementary material
Source: publisher figshare collection journal article supplement (https://gsapubs.figshare.com/articles/dataset/_/16847626)
Supplement: Supplementary file 1 [file 1]

Jiaopeng Sun, Yunpeng Dong, Licheng Ma, Shiyue Chen, and Wan Jiang, 2021, Devonian to Triassic tectonic evolution and basin transition in the East Kunlun–Qaidam area, northern Tibetan Plateau: Constraints from stratigraphy and detrital zircon U–Pb geochronology: GSA Bulletin, <https://doi.org/10.1130/B36147.1>.

## Supplemental Material

**Table S1.** Laser ablation inductively coupled plasma spectrometry (LA-ICP-MS) data of detrital zircons from Carboniferous and Permian sandstones from the East Kunlun-Qaidam area.

**Table S2.** Compilation of detrital zircon U-Pb ages used for comparison in Figure 12 from the East Kunlun-Qaidam area and its vicinity (See references in caption of Figure 12).
